# Supplementary material for: IFDlong: an isoform and fusion detector for accurate annotation and quantification of long-read RNA-seq data
Source: PubMed Central journal article supplement — bioRxiv. 2024 May 14:2024.05.11.593690. Preprint. [Version 1] doi: 10.1101/2024.05.11.593690 (PMC11118288; doi:10.1101/2024.05.11.593690), 2024-05-14

## Supplementary Figure Legend

**Figure S1: Read count distribution for the (A) Universal Human Reference real data and the (B) The Type I1 simulation data with gradient depth.**

**Figure S2: Read length distribution of the Type I1 simulation data with gradient median read length.**

**Figure S3: Root mean squared error (RMSE) between the true and the estimated isoform expression in the Type I1 simulation data.** (A) RMSE of isoform expression between the truth and each tool under different sequencing accuracy with 0.5M reads and 1500 bp median length. (B) RMSE of isoform expression between the truth and each tool under different sequencing depth with accurate sequencing and 1500 bp median length. (C) RMSE of isoform expression between the truth and each tool under gradient median read lengths with 0.5M reads and accurate sequencing.

**Figure S4: Computational cost for isoform quantification tools in the Type I1 simulation.** (A&B) Time cost along different number of reads and read lengths. (C) Memory cost across different read lengths when working on 4M reads.

**Figure S5: The percentage contingency table between the true isoform assignments and the annotation by IFDlong in the Type I2 simulation data with gradient median read lengths.**

**Figure S6: Sensitivity (left) and Specificity (right) of IFDlong when detecting novel isoforms in the Type I3 simulation with ONT (top) and PacBio (bottom) accuracy.** The bars are colored by different buffer length setter (0bp or 9bp) and median length (1000 bp or 2000 bp) settings.

**Figure S7: Sensitivity (left) and Specificity (right) of TALON when detecting novel isoforms in the Type I3 simulation with ONT (top) and PacBio (bottom) accuracy.** The bars are colored by different median length (1000 bp or 2000 bp) settings.

**Figure S8: Spearman's correlation of isoform quantification in human MCF7 breast cancer cell line by different ONT sequencing settings.**

**Figure S9: Pairwise comparison of isoform quantification in mouse C2C12 and Heart samples.** The bottom left cells present the pairwise scatter plot of isoform expression. The upper right cells indicate the Spearman's correlation.

**Figure S10: Isoform distribution of Calcium Voltage-Gated Channel Subunit Alpha1 C (Cacna1c), Troponin T2 (Tnnt2), Calcium/Calmodulin Dependent Protein Kinase II Gamma (Camk2g) and Myocyte Enhancer Factor 2C (Mef2c) in heart tissue.**

**Figure S11: Pathway analysis on isoform differential expression analysis in HCC data. (A) Gene set enrichment analysis (GSEA) on Gene ontology (GO) database. (B) Ingenuity pathway analysis (IPA).**

**Figure S12: Feature plot of isoform expression for gene CCL5 and IL7R in HCC data.**

**Figure S13: Pairwise comparison of fusion quantification in the Type F1 simulation. (A) The Type F1 simulation with median length of 1500 bp and PacBio accuracy. (B) The Type F1 simulation with median length of 1500 bp and ONT accuracy.** The bottom left cells present the pairwise scatter plot of isoform expression. The upper right cells indicate the Spearman's correlation.

**Figure S14: Scatter plot of isoform-level fusion quantification comparing the truth the IFDlong estimation in the Type F1 simulation. (A) The Type F1 simulation with median length of 1500 bp and accurate setting. (B) The Type F1 simulation with median length of 1500 bp and PacBio accuracy. (C) The Type F1 simulation with median length of 1500 bp and ONT accuracy.**

**Figure S15: Precision and Recall curve for fusion transcript detection by IFDlong pipeline using different anchor lengths. (A) The Type F1 simulation with median length of 1500 bp and PacBio accuracy. (B) The Type F1 simulation with median length of 1500 bp and ONT accuracy.**

**Figure S16: Relative abundance of multiple paired genes in the Type F2 simulation data with different accuracy setting. (A) The Type F2 simulation with 1500 bp median length and PacBio setting. (B) The Type F2 simulation with 1500 bp median length and ONT setting.**

**Figure S17: Cosine similarity of the relative abundance of multiple paired genes in the Type F2 simulation data. (A) The Type F2 simulation with median length to be 200bp and accurate setting. (B) The Type F2 simulation with median length to be 1000bp and accurate setting. (C) The Type F2 simulation with median length to be 1500bp and PacBio setting. (D) The Type F2 simulation with median length to be 1500bp and ONT setting.**

**Figure S18: Relative abundance of multiple paired genes in the Type F2 simulation data with gradient median length.** (A) The Type F2 simulation with 200 bp median length and accurate setting. (B) The Type F2 simulation with 1000 bp median length and accurate setting.

## **Supplementary Table**

**Table S1: Isoform quantification by IFDlong on UHR dataset.**

**Table S2: Isoform quantification by IFDlong on MCF7 dataset.**

**Table S3: Isoform quantification by IFDlong on mouse C2C12 dataset.**

**Table S4: Isoform quantification by IFDlong on mouse heart dataset.**

**Table S5: Differentially expressed isoforms in HCC dataset comparing tumor and normal.**

**Table S6: Pathway analysis on the differentially expressed isoforms in HCC dataset.**

**Table S7: Popular fusion transcripts in TCGA dataset that were employed in the Type F2 simulation.**

**Table S8: Two-way fusions detected in MCF7 ONT dataset by IFDlong.**

Figure S1

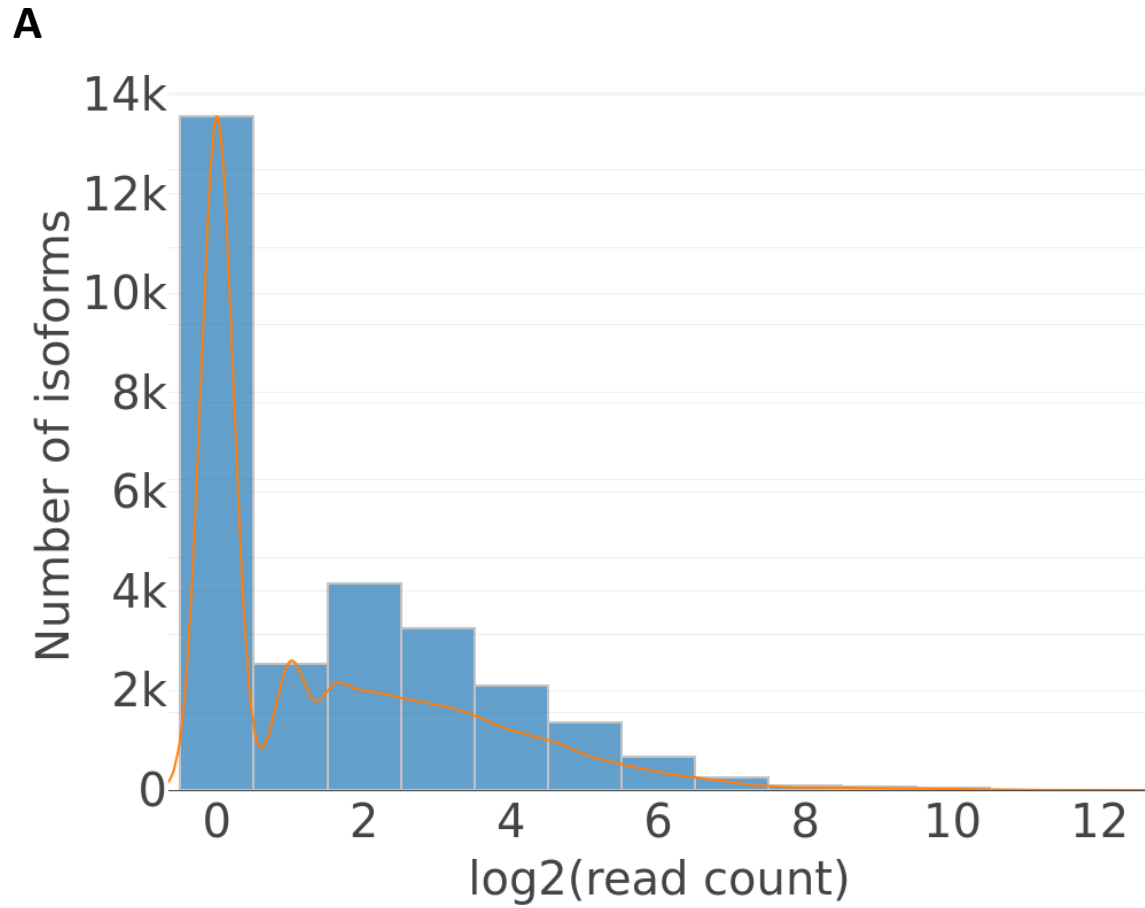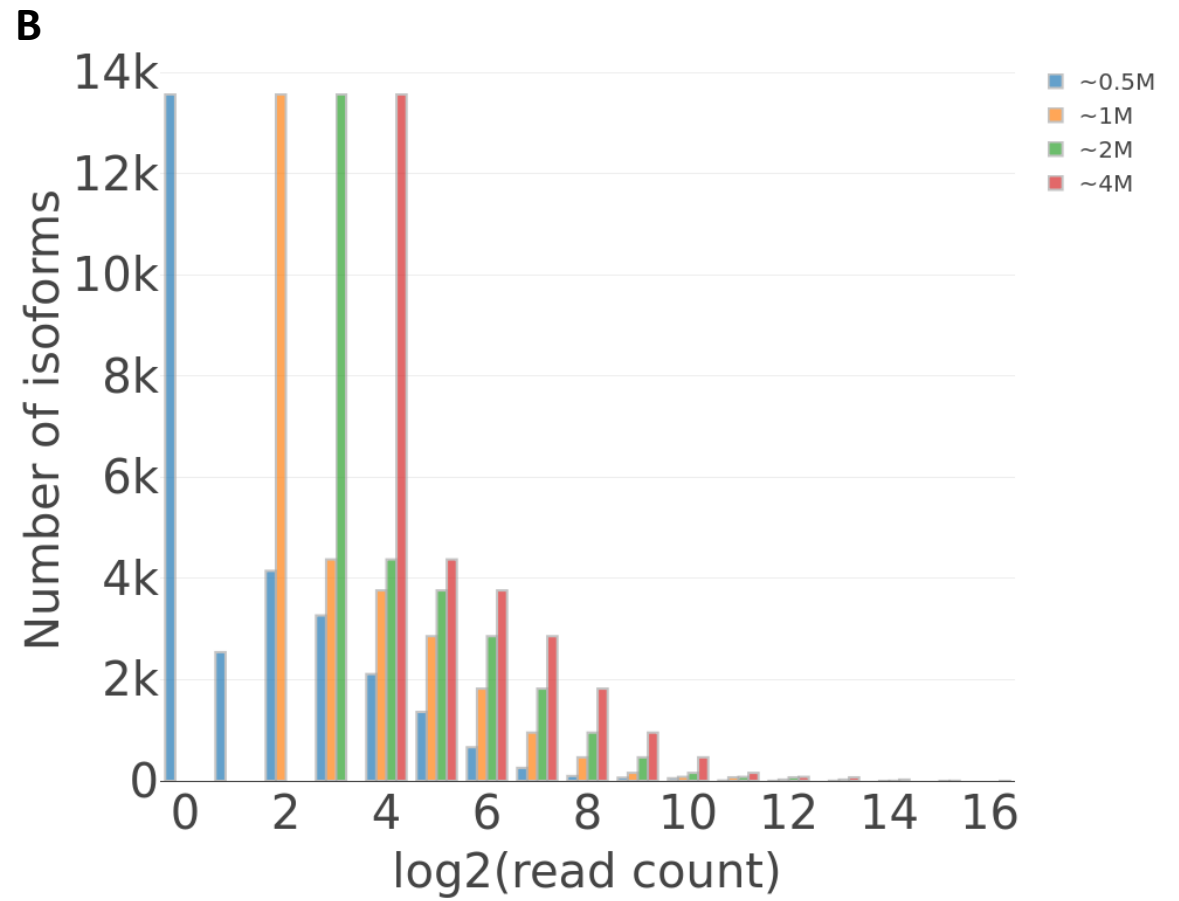

**Figure S2**

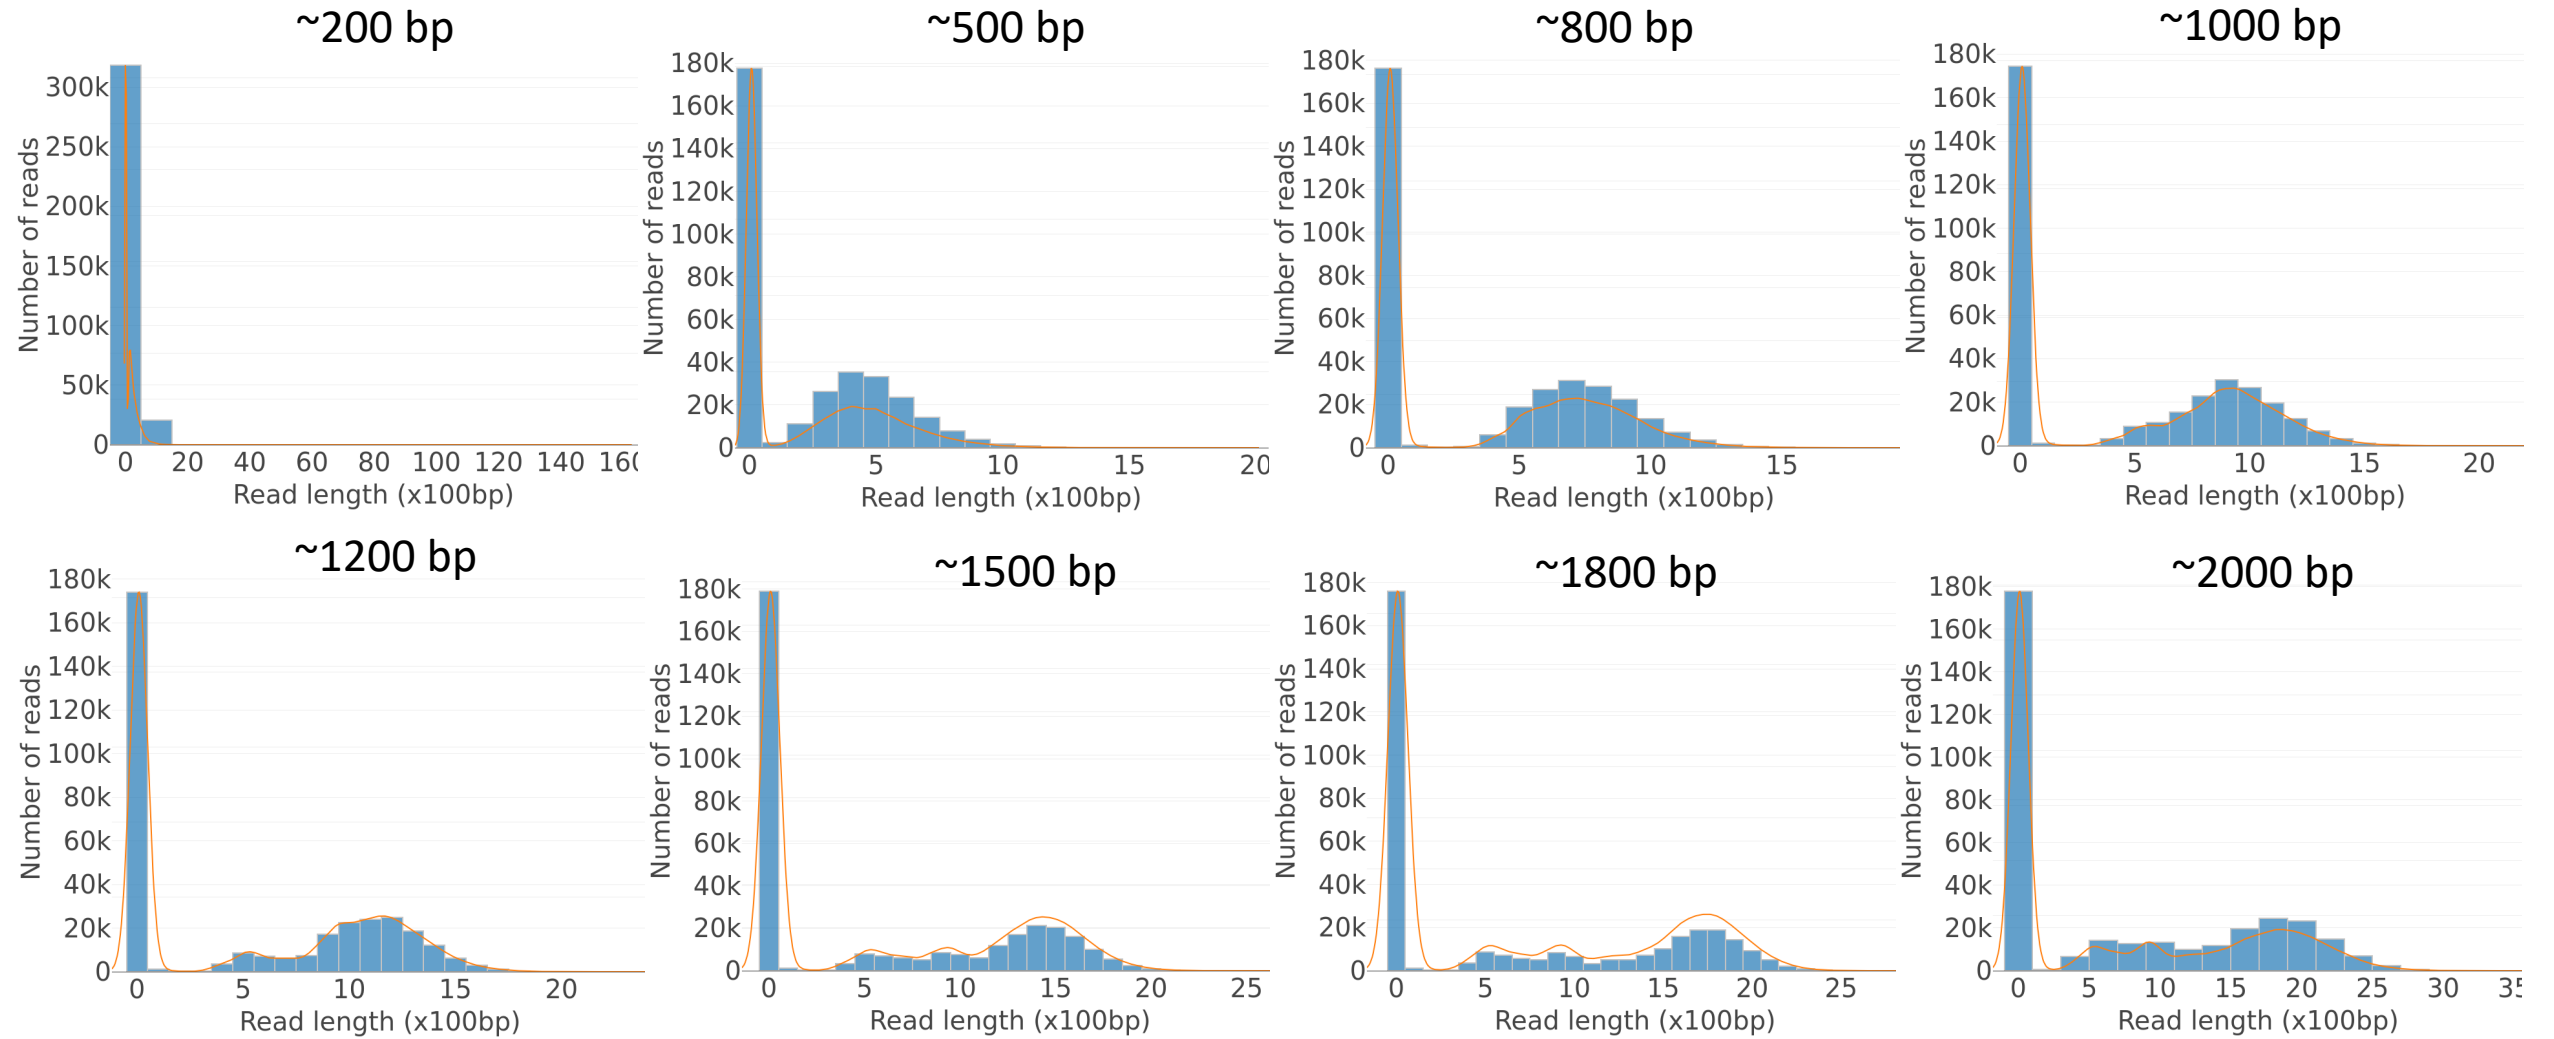

Figure S3

B

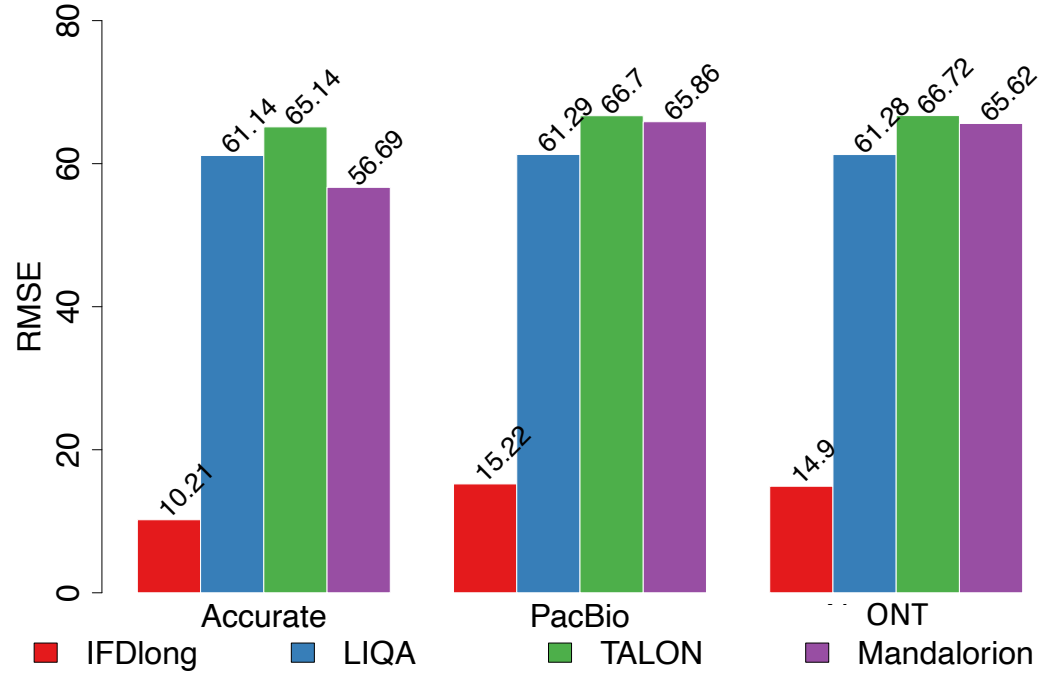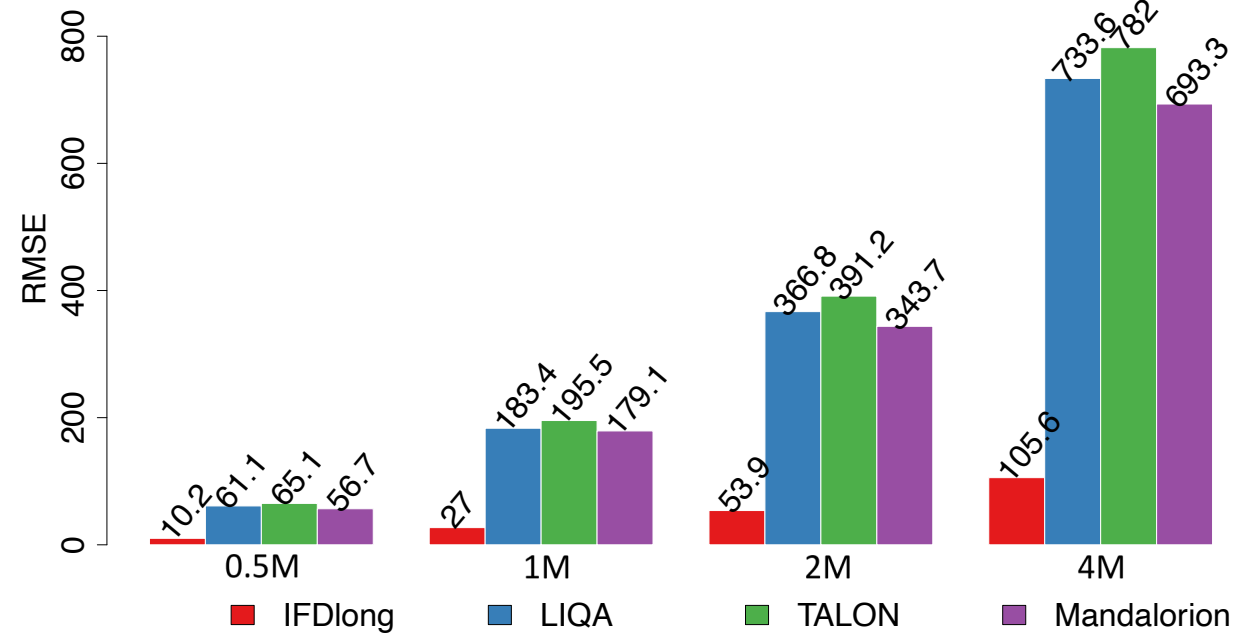

C

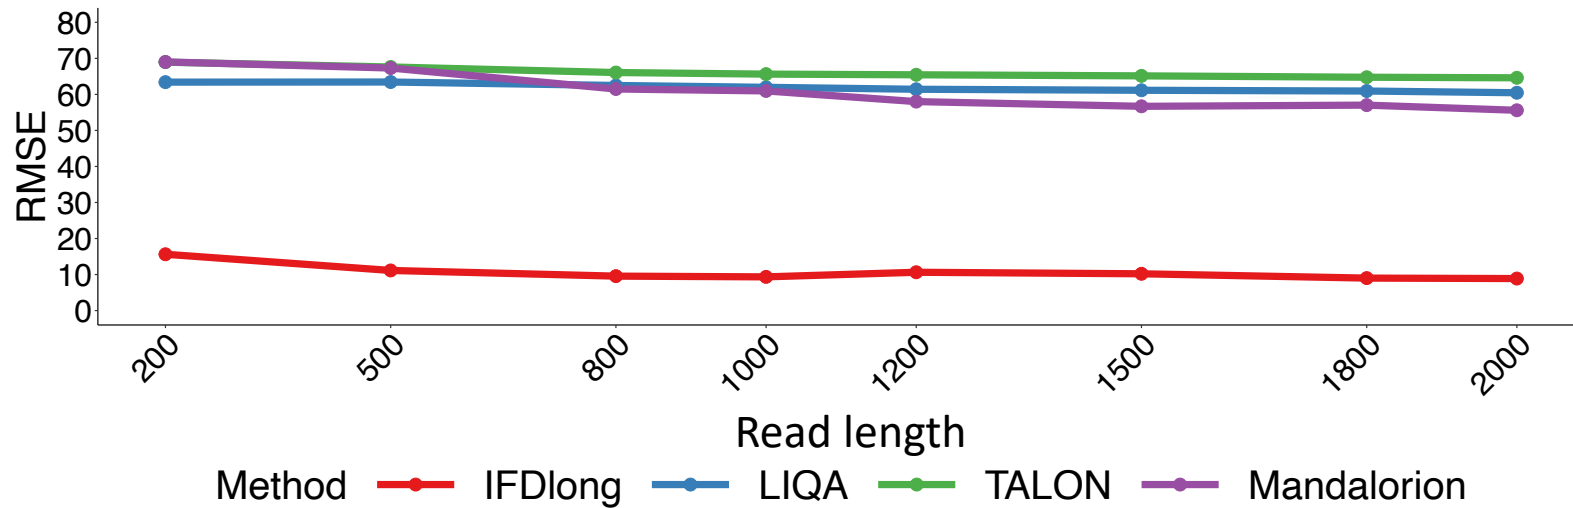

Figure S4

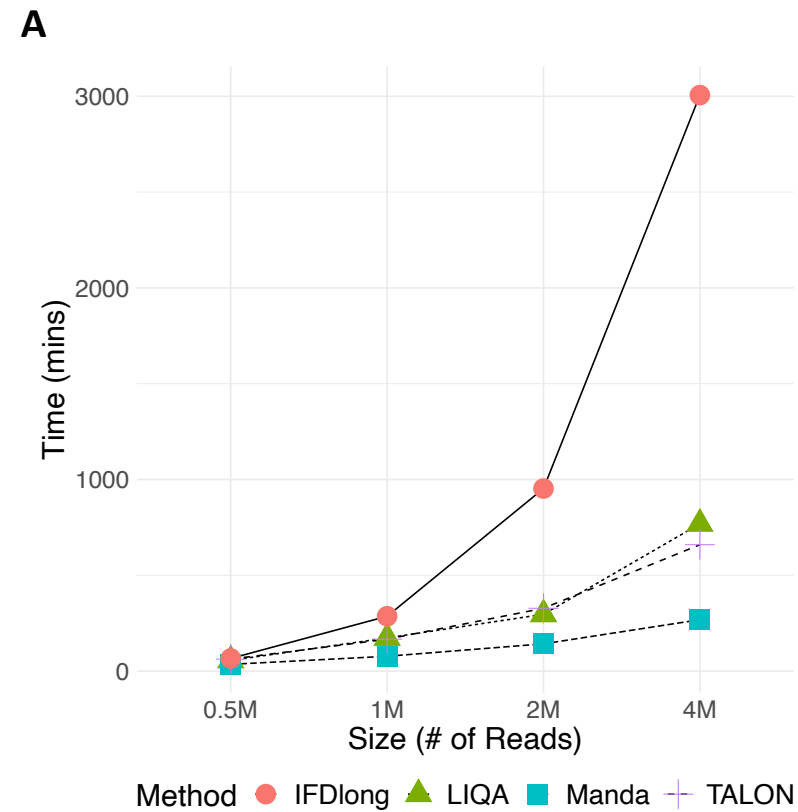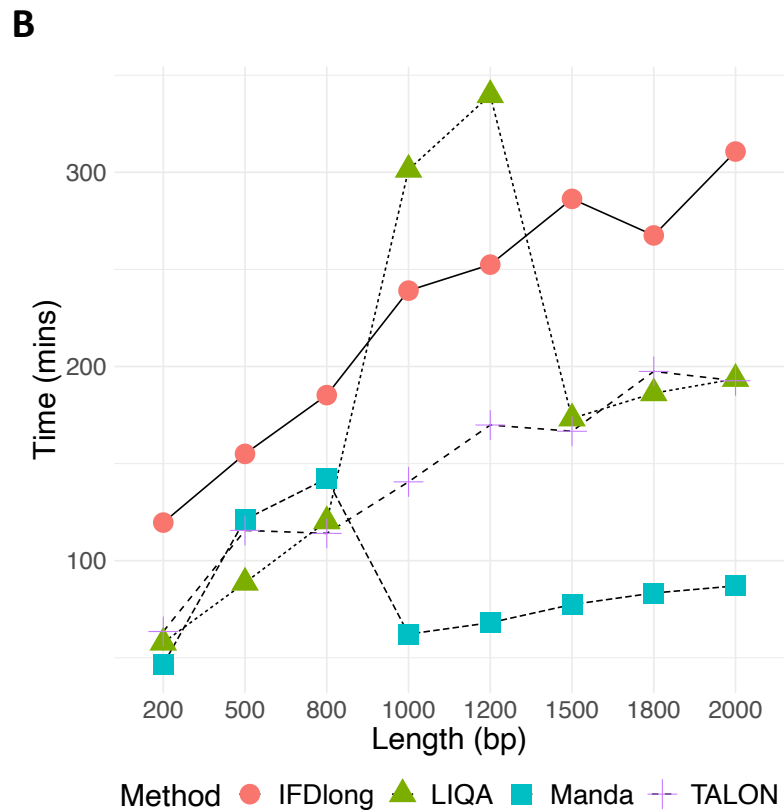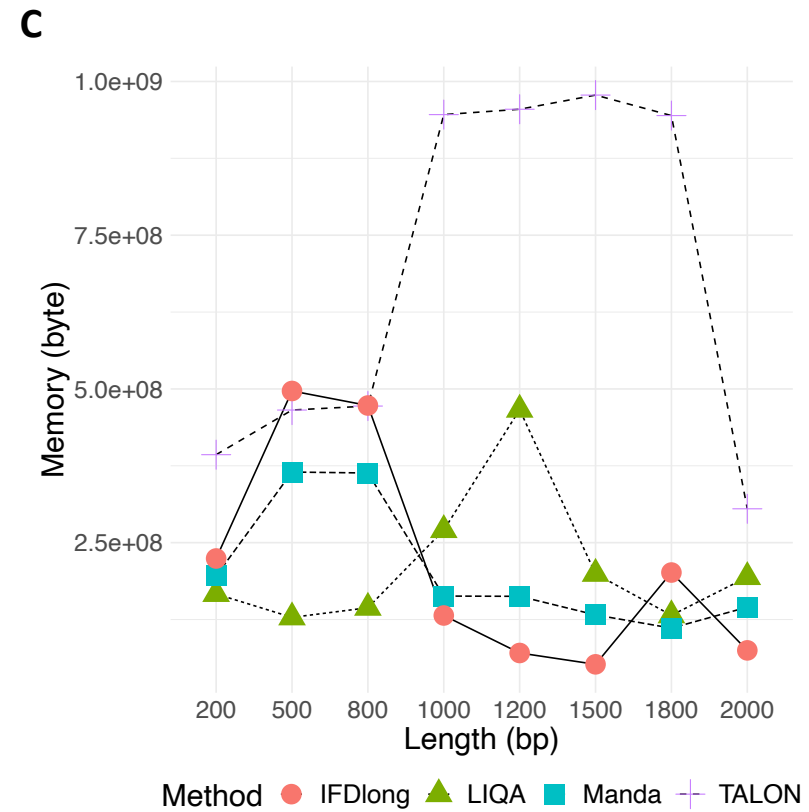

Figure S5

~200 bp

IFDlong annotation

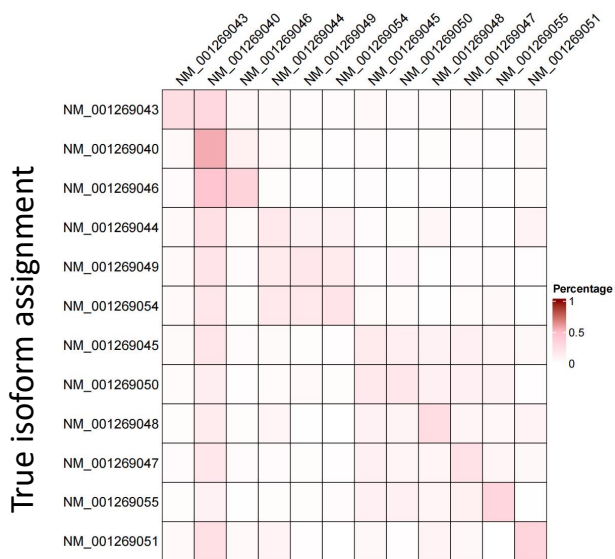

~500 bp

IFDlong annotation

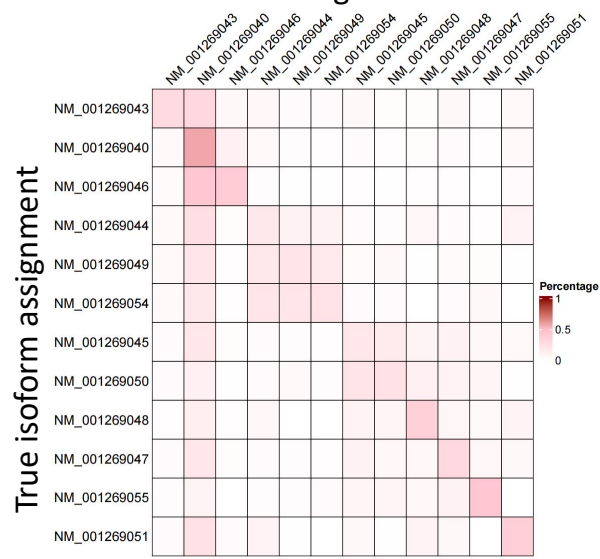

~800 bp

IFDlong annotation

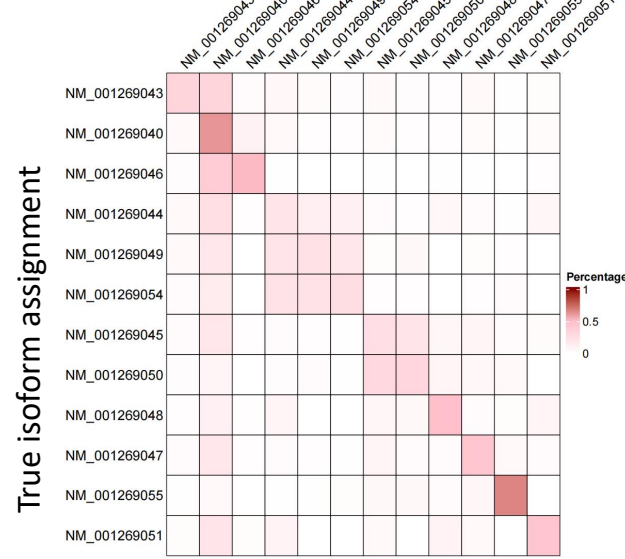

~1000 bp

IFDlong annotation

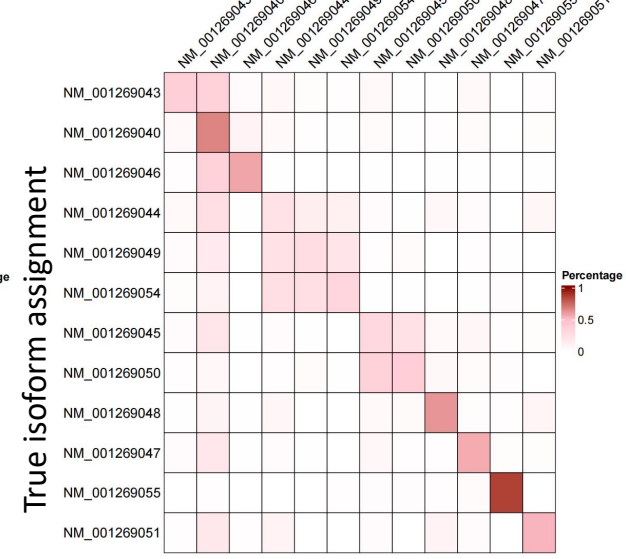

~1200 bp

IFDlong annotation

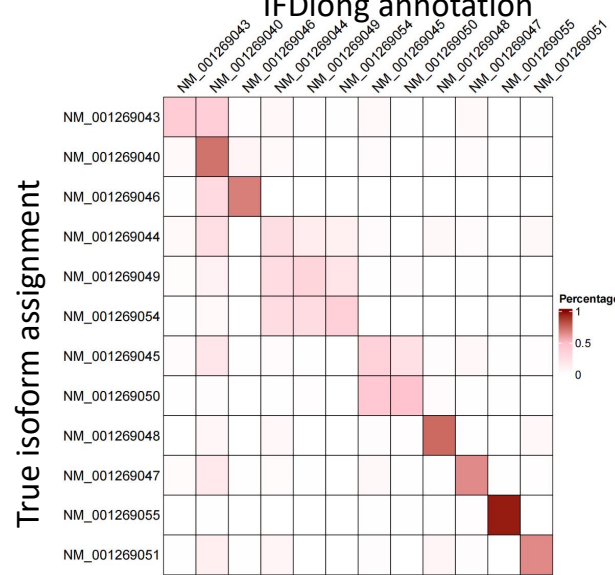

~1500 bp

IFDlong annotation

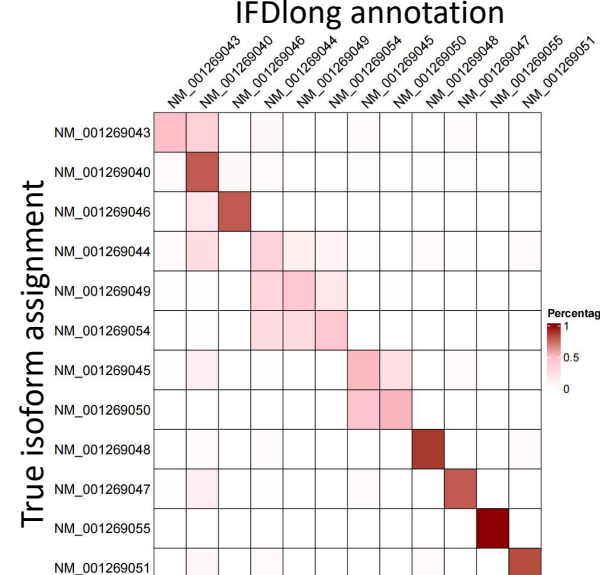

~1800 bp

IFDlong annotation

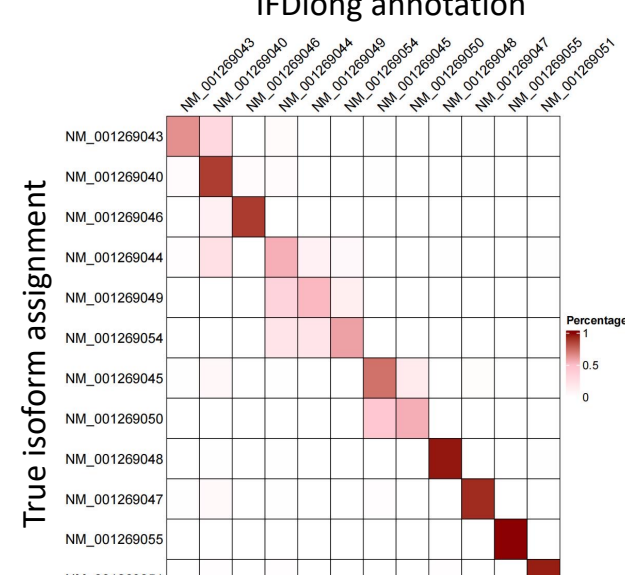

~2000 bp

IFDlong annotation

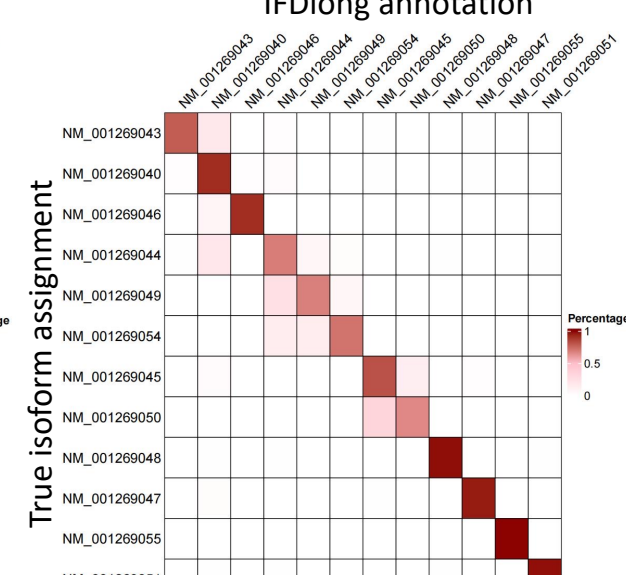



# Figure S6

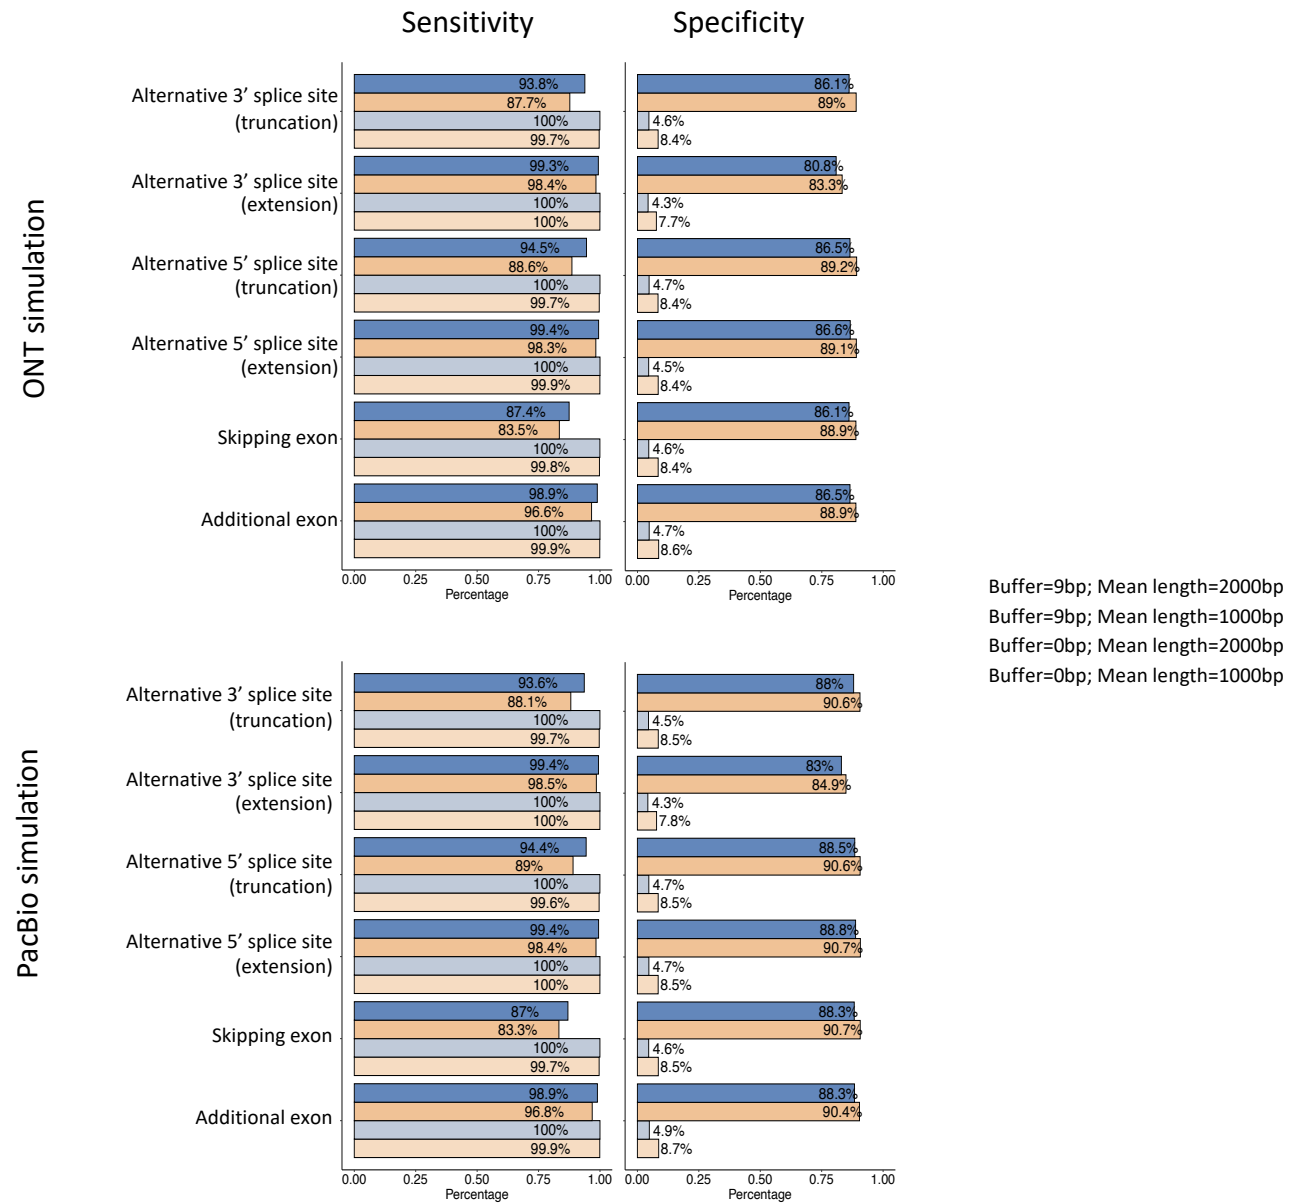

# Figure S7

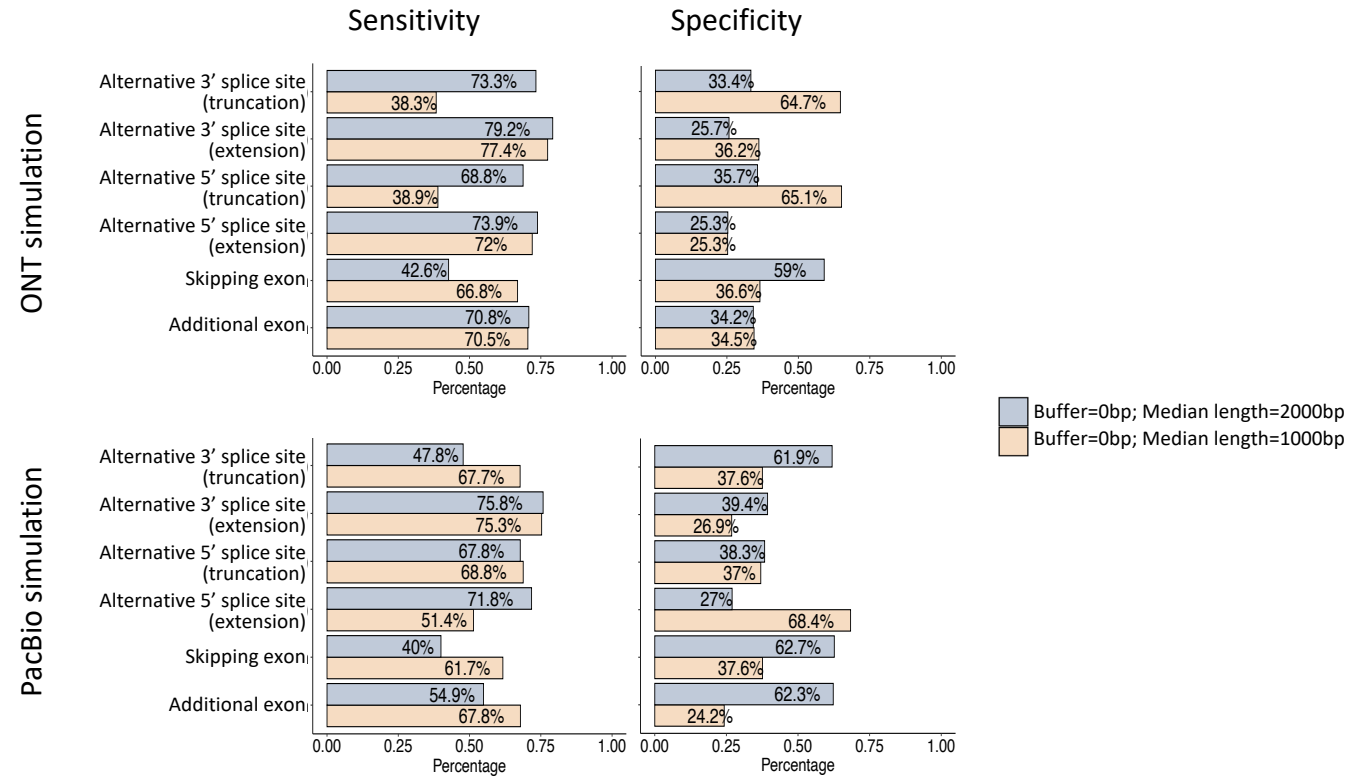

Figure S8

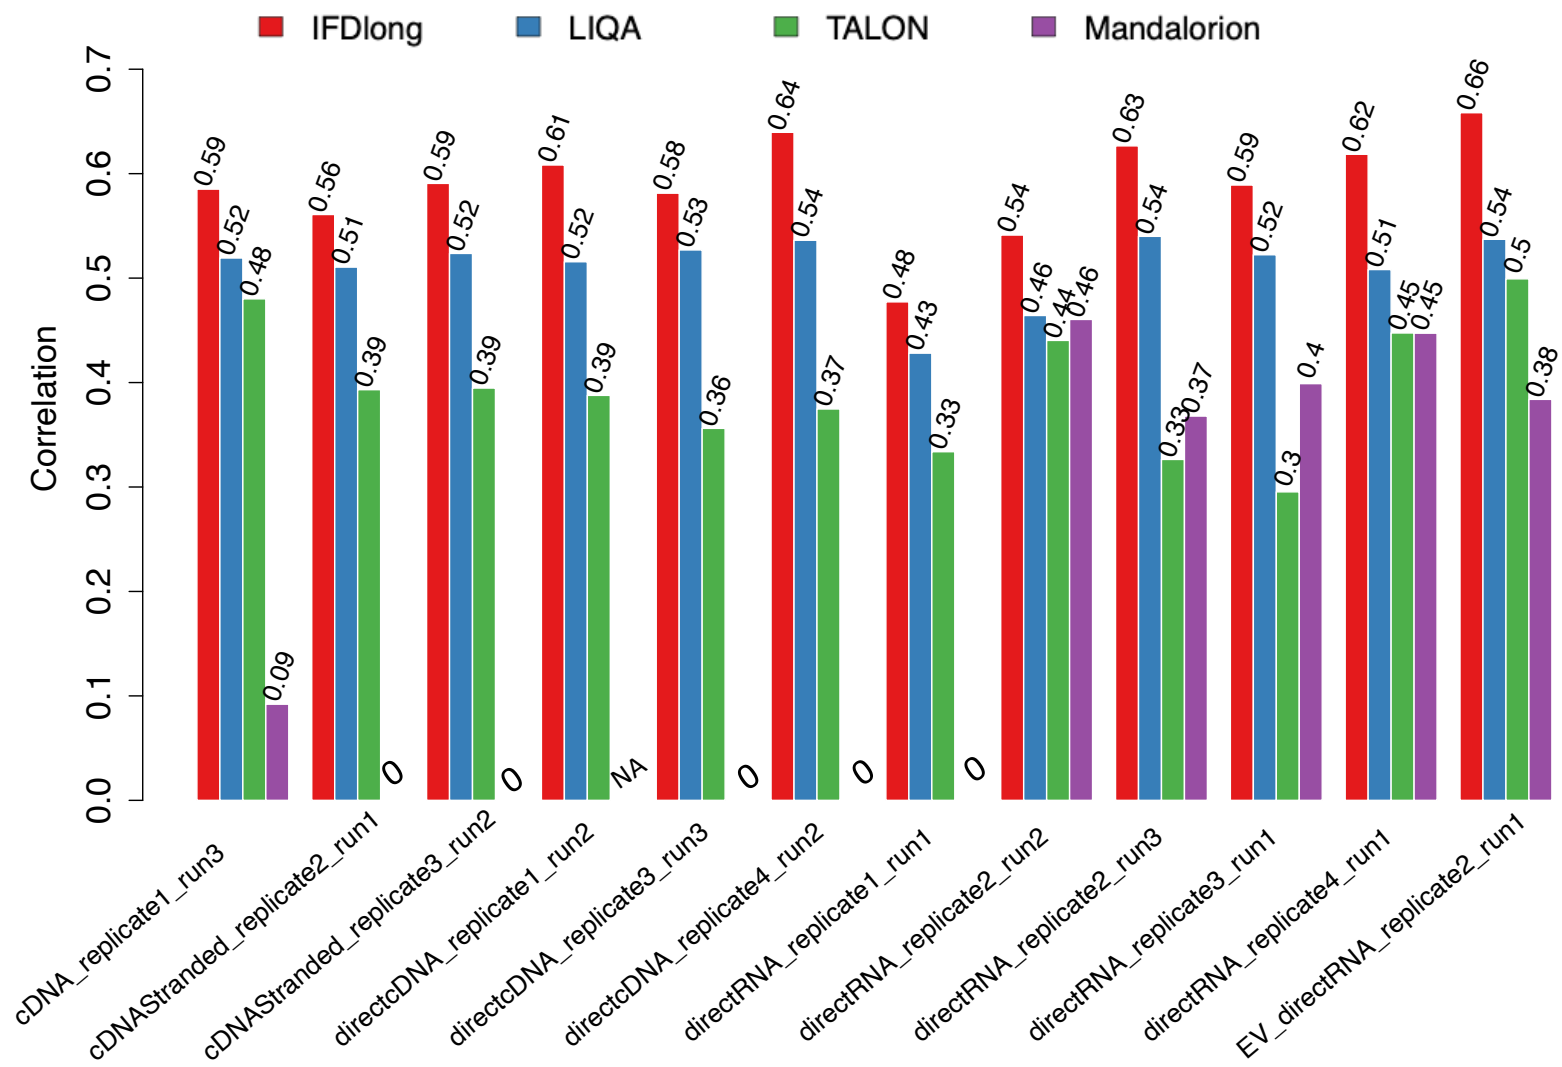

Figure S9

C2C12\_R1

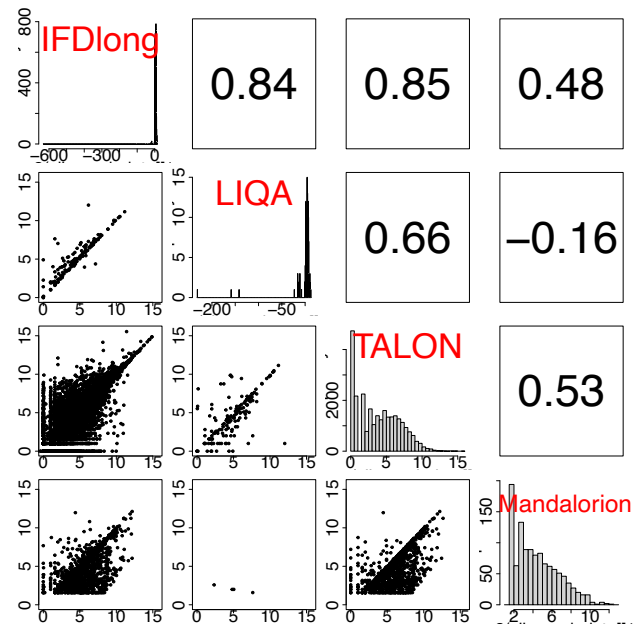

C2C12\_R2

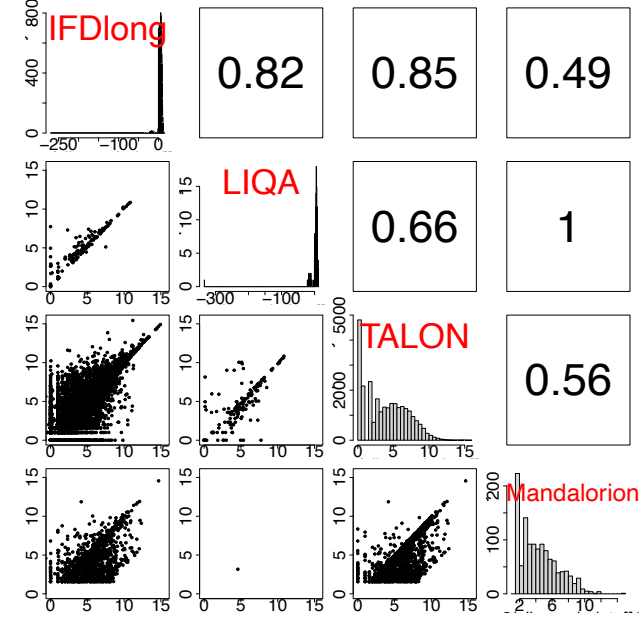

C2C12\_R3

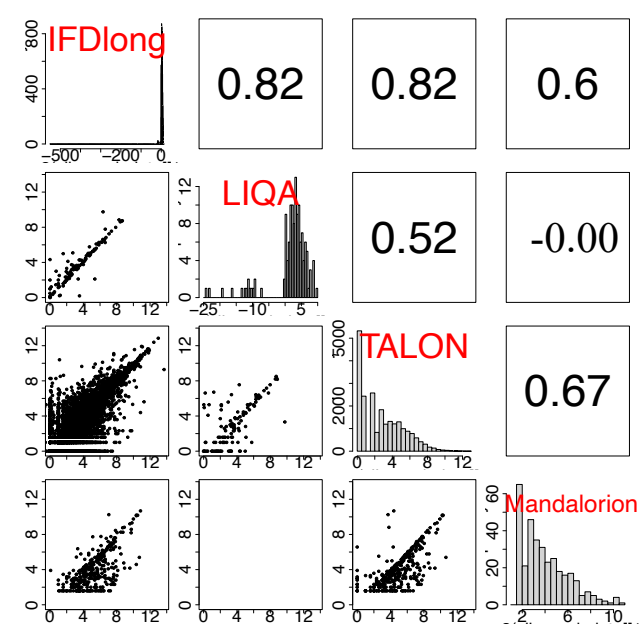

C2C12\_R4

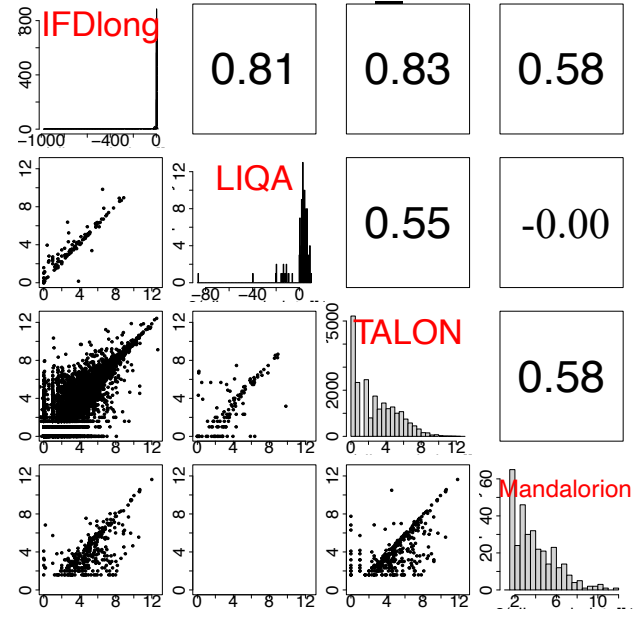

Heart\_R1

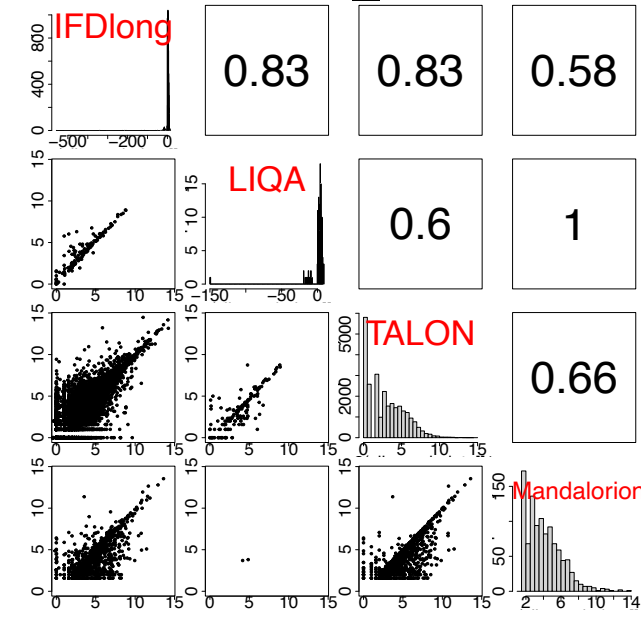

Heart\_R2

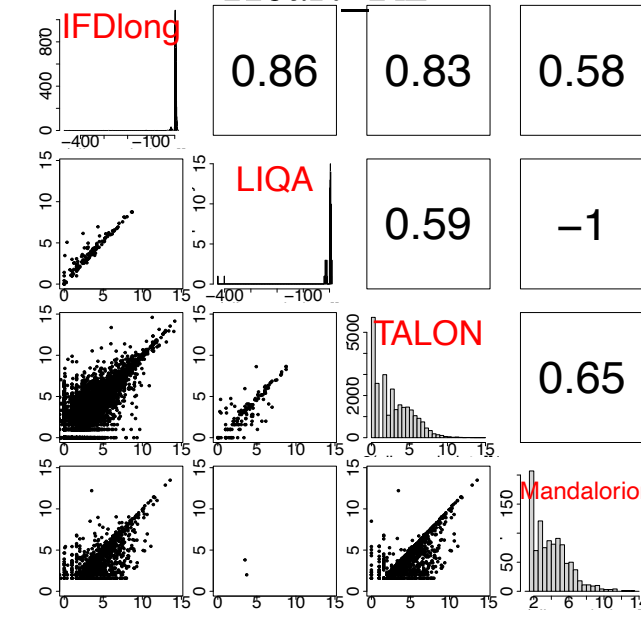

Figure S10

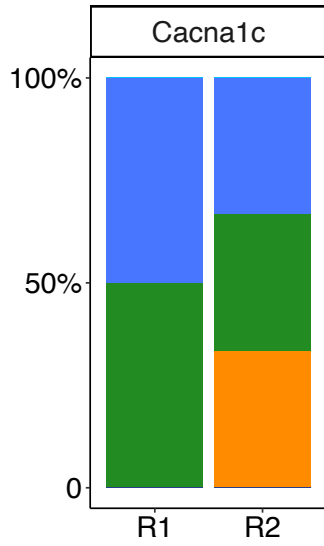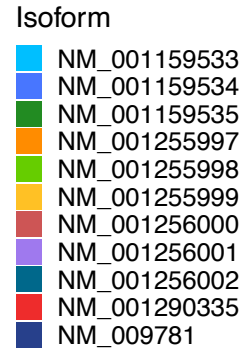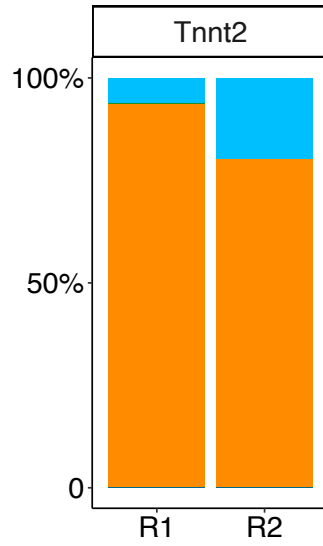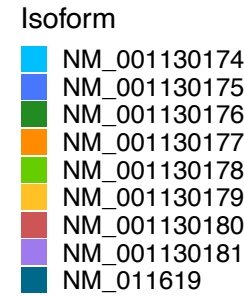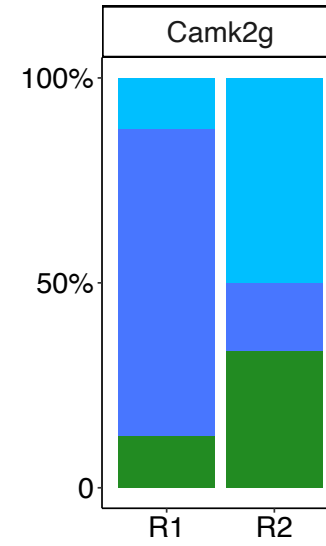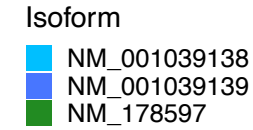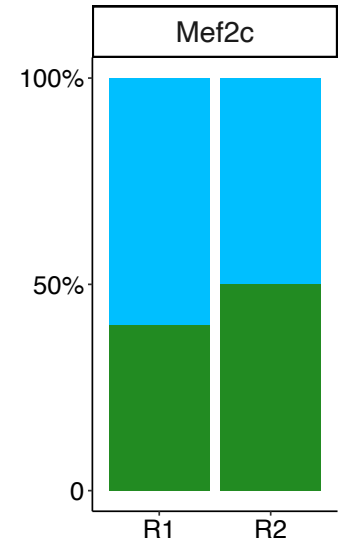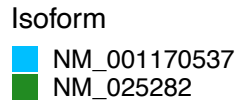

Figure S11

A

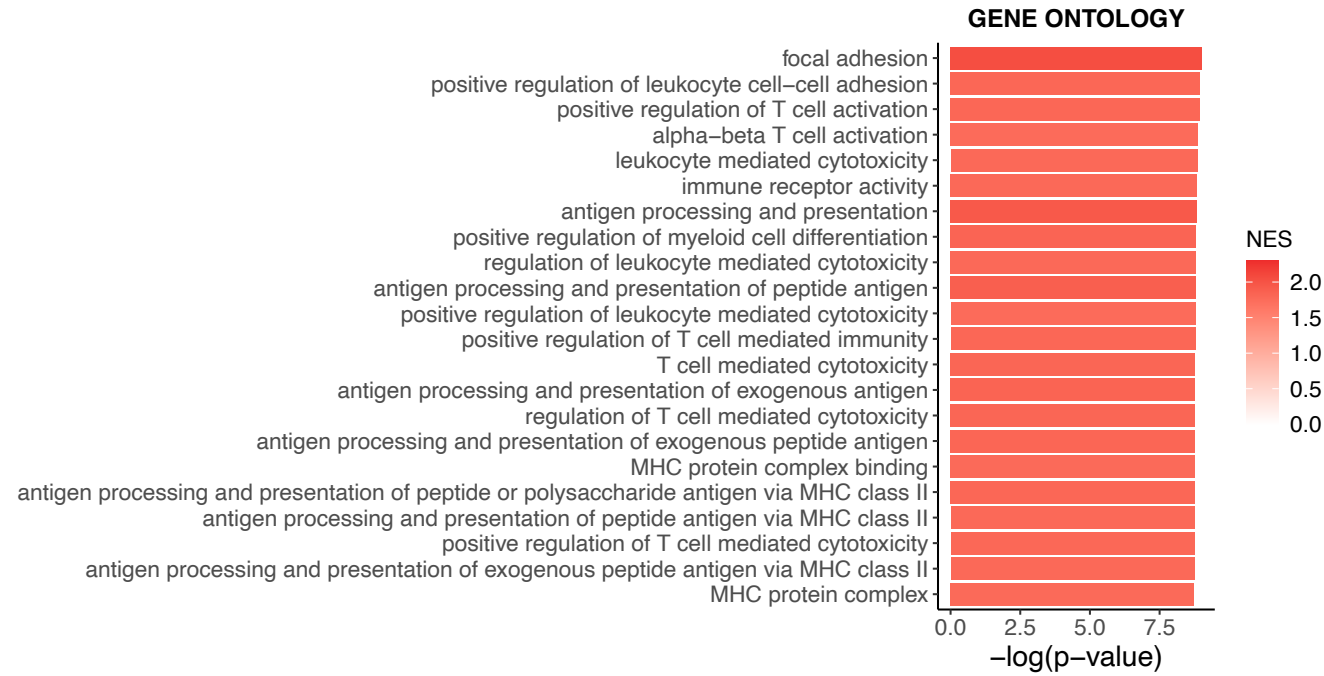

B

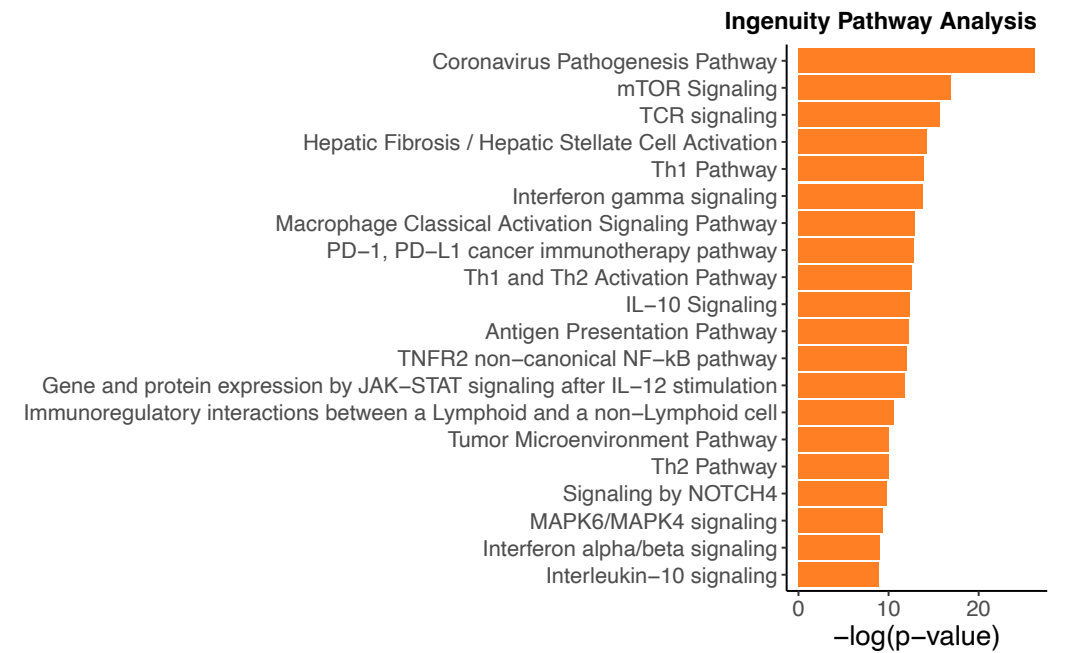

Figure S12

**A**

CCL5

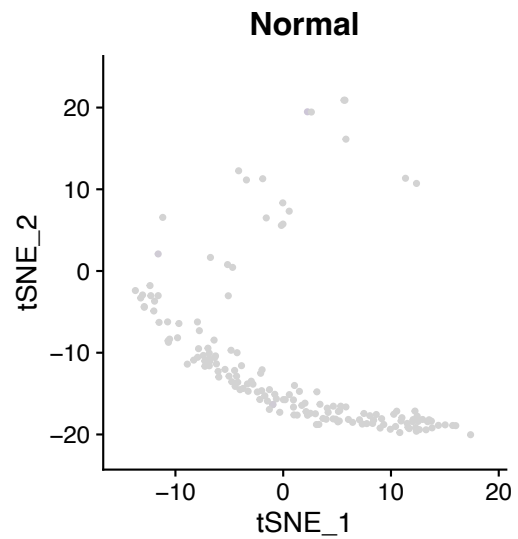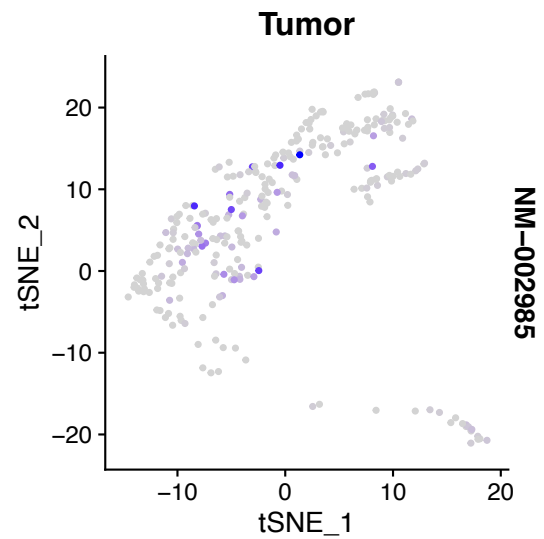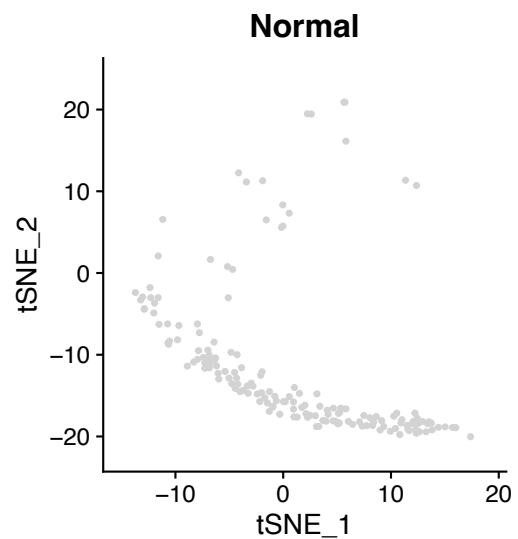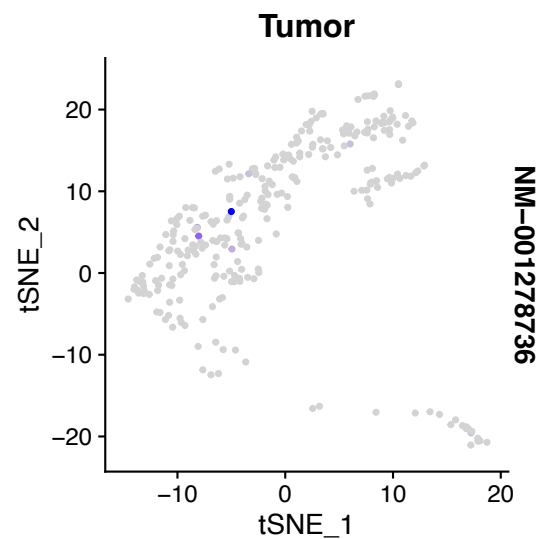

**B**

IL7R

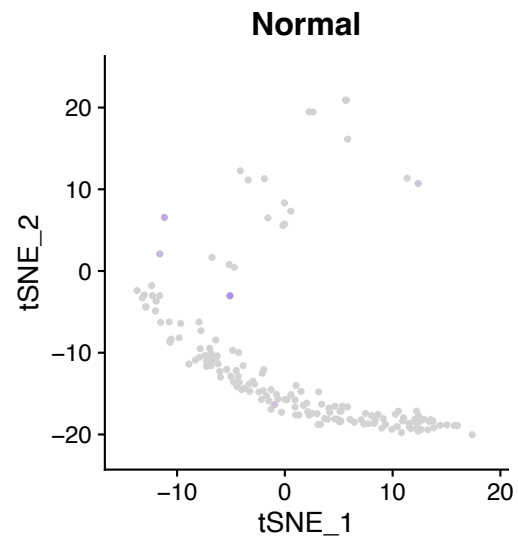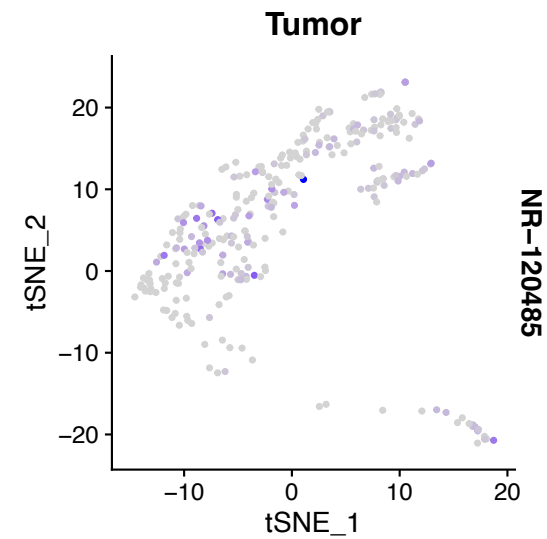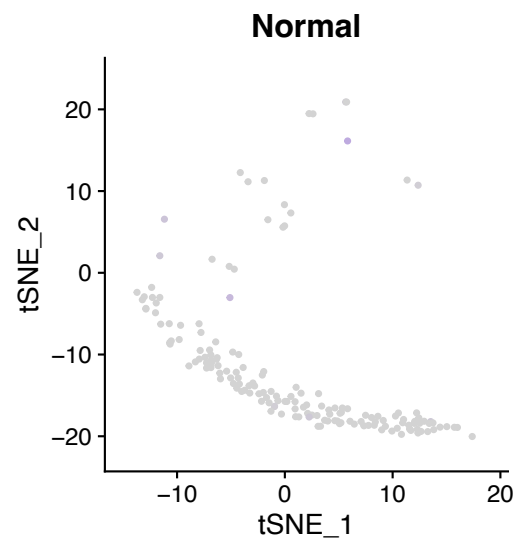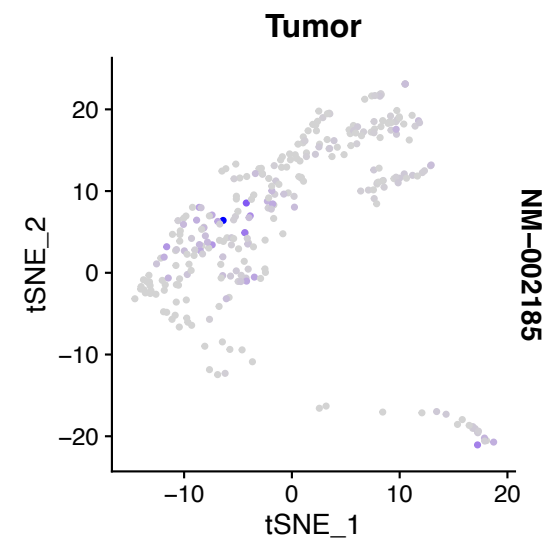

Figure S13

A

PacBio

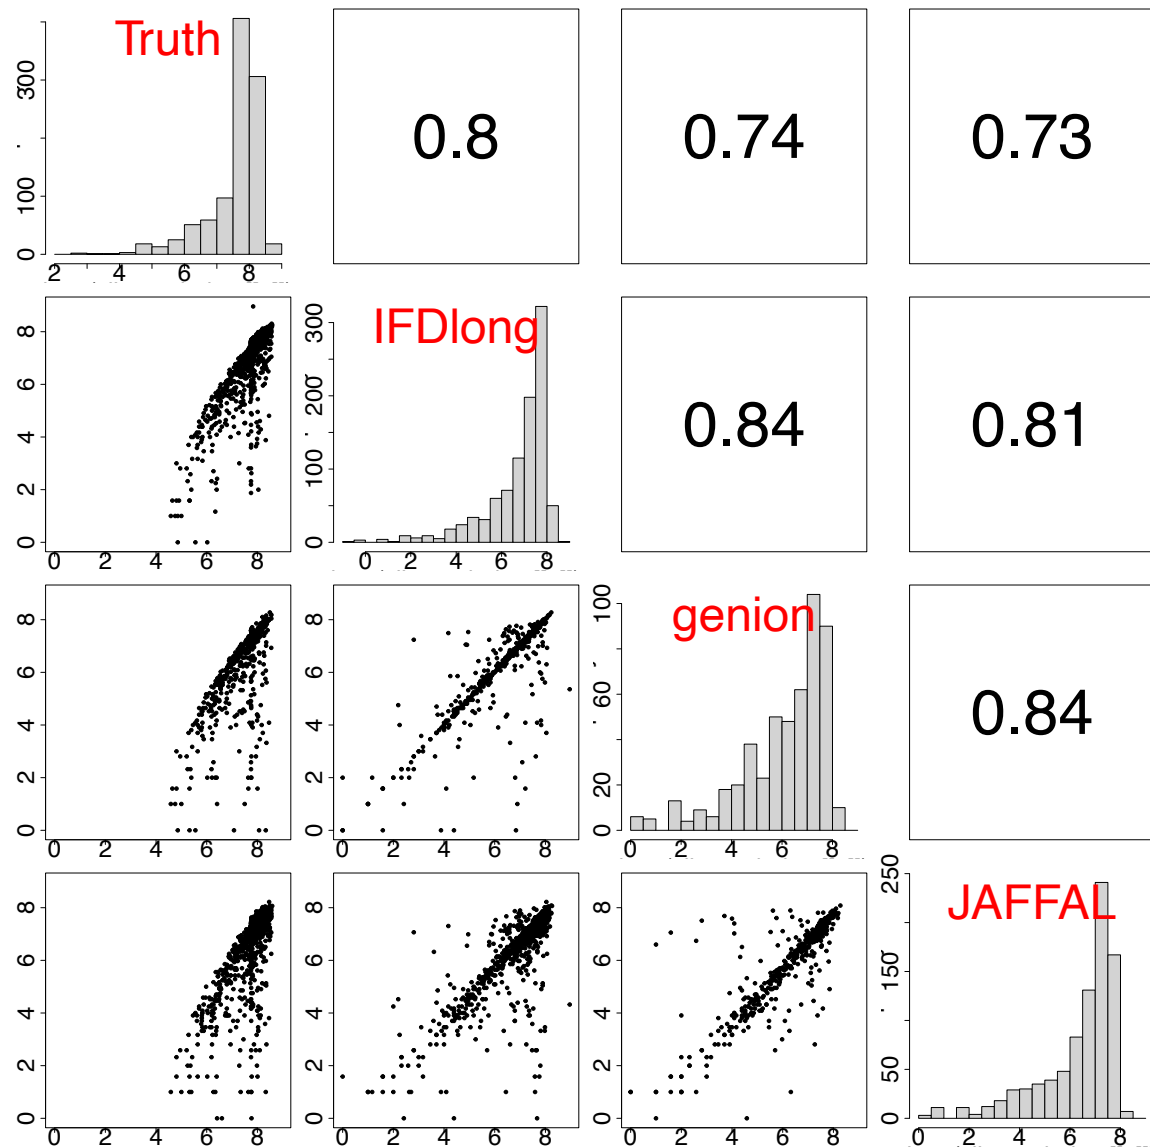

B

ONT

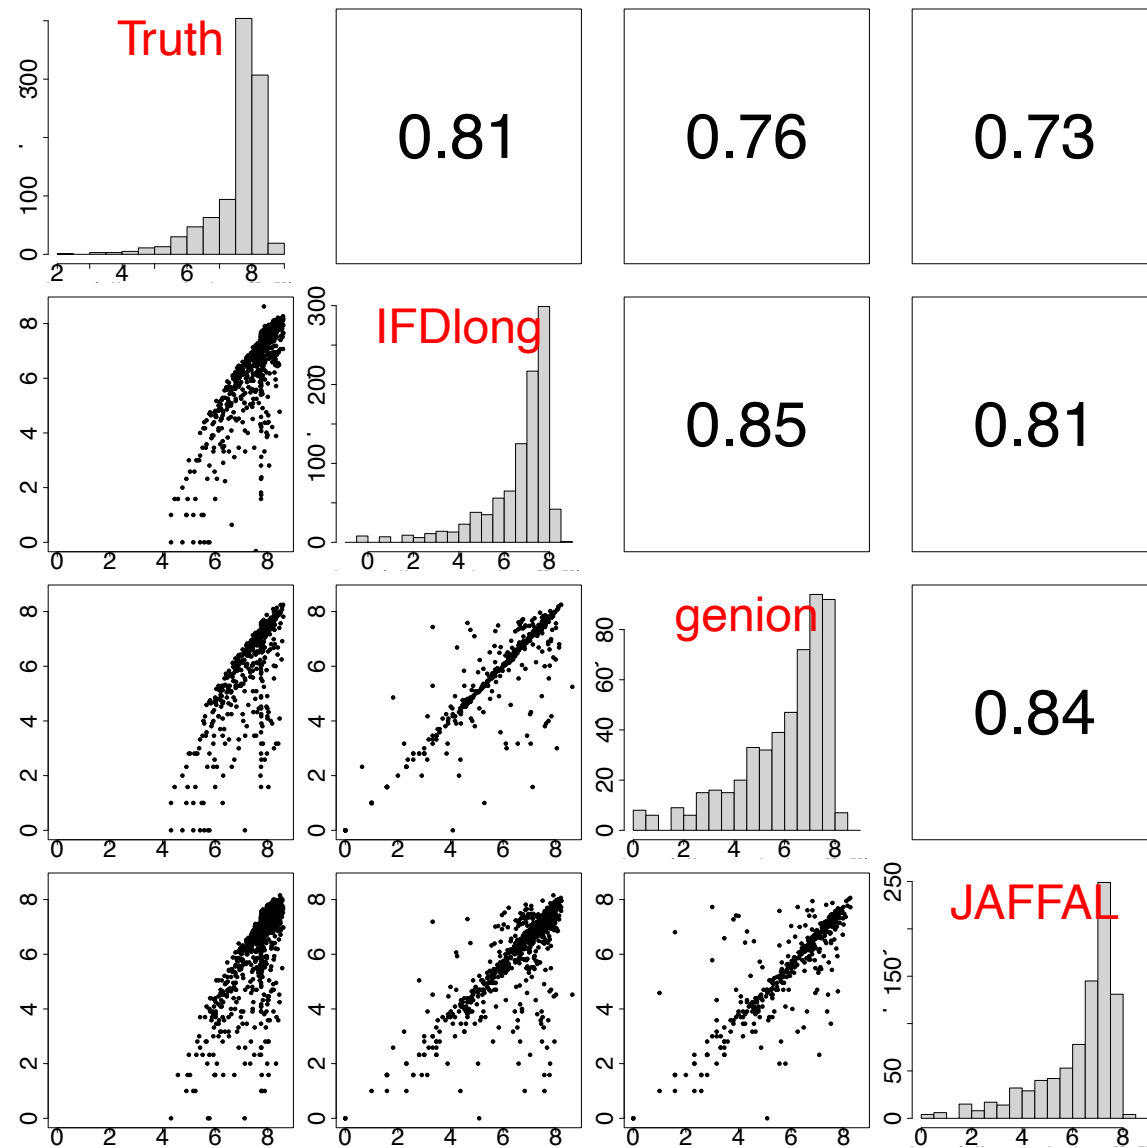



Figure S14

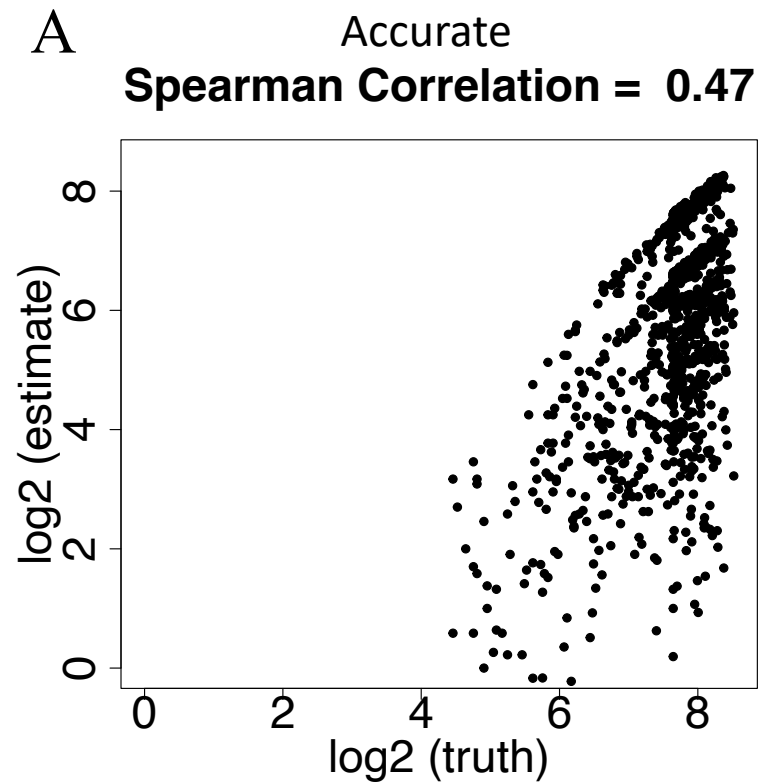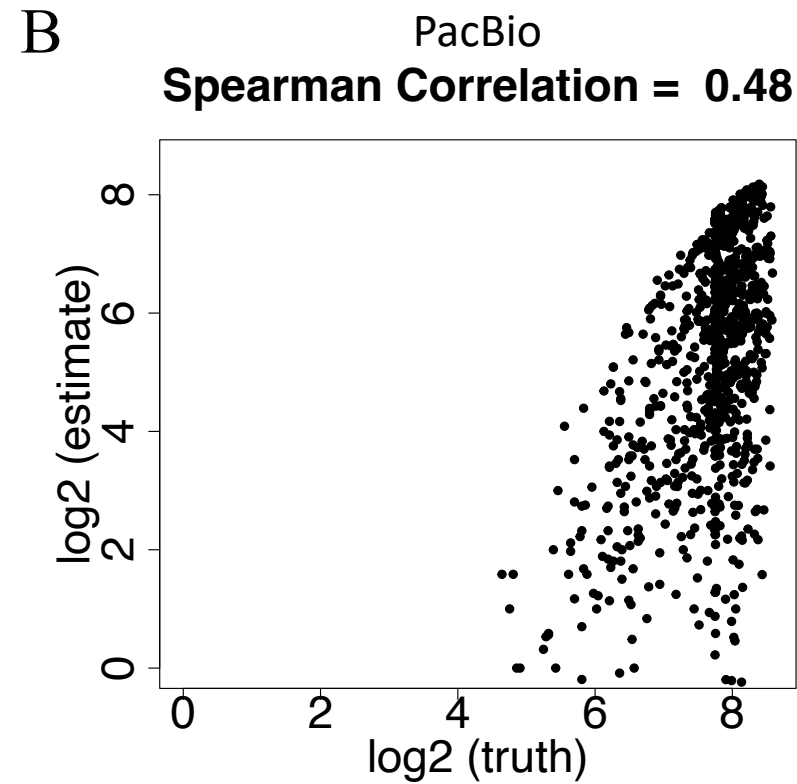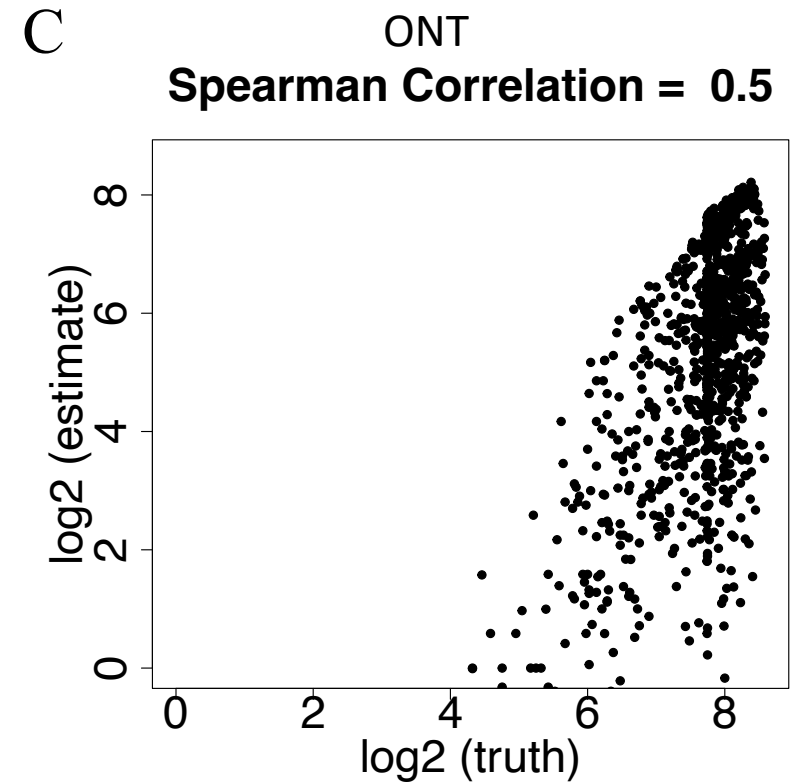

Figure S15

A

PacBio simulation

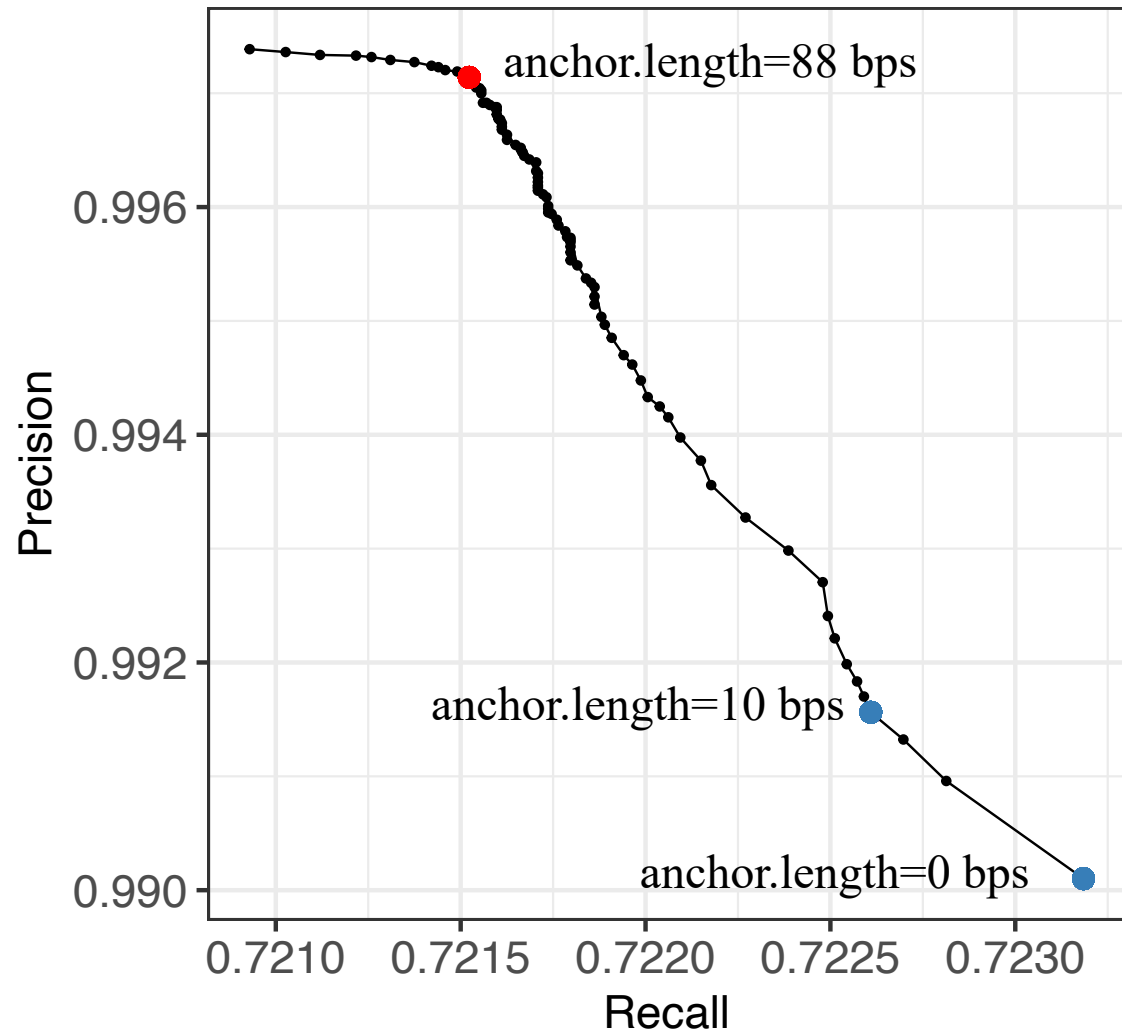

B

ONT simulation

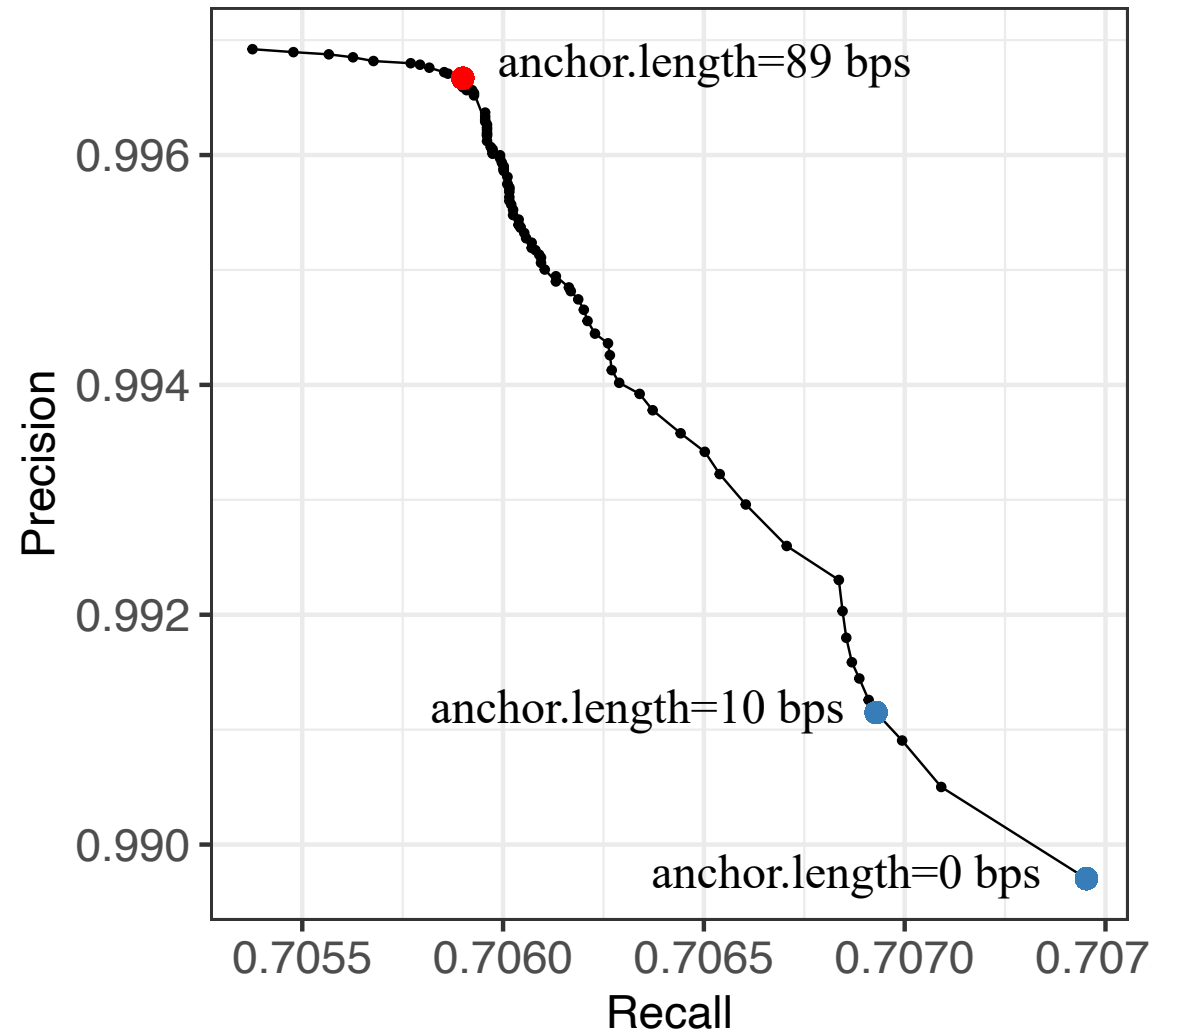

Figure S16

A

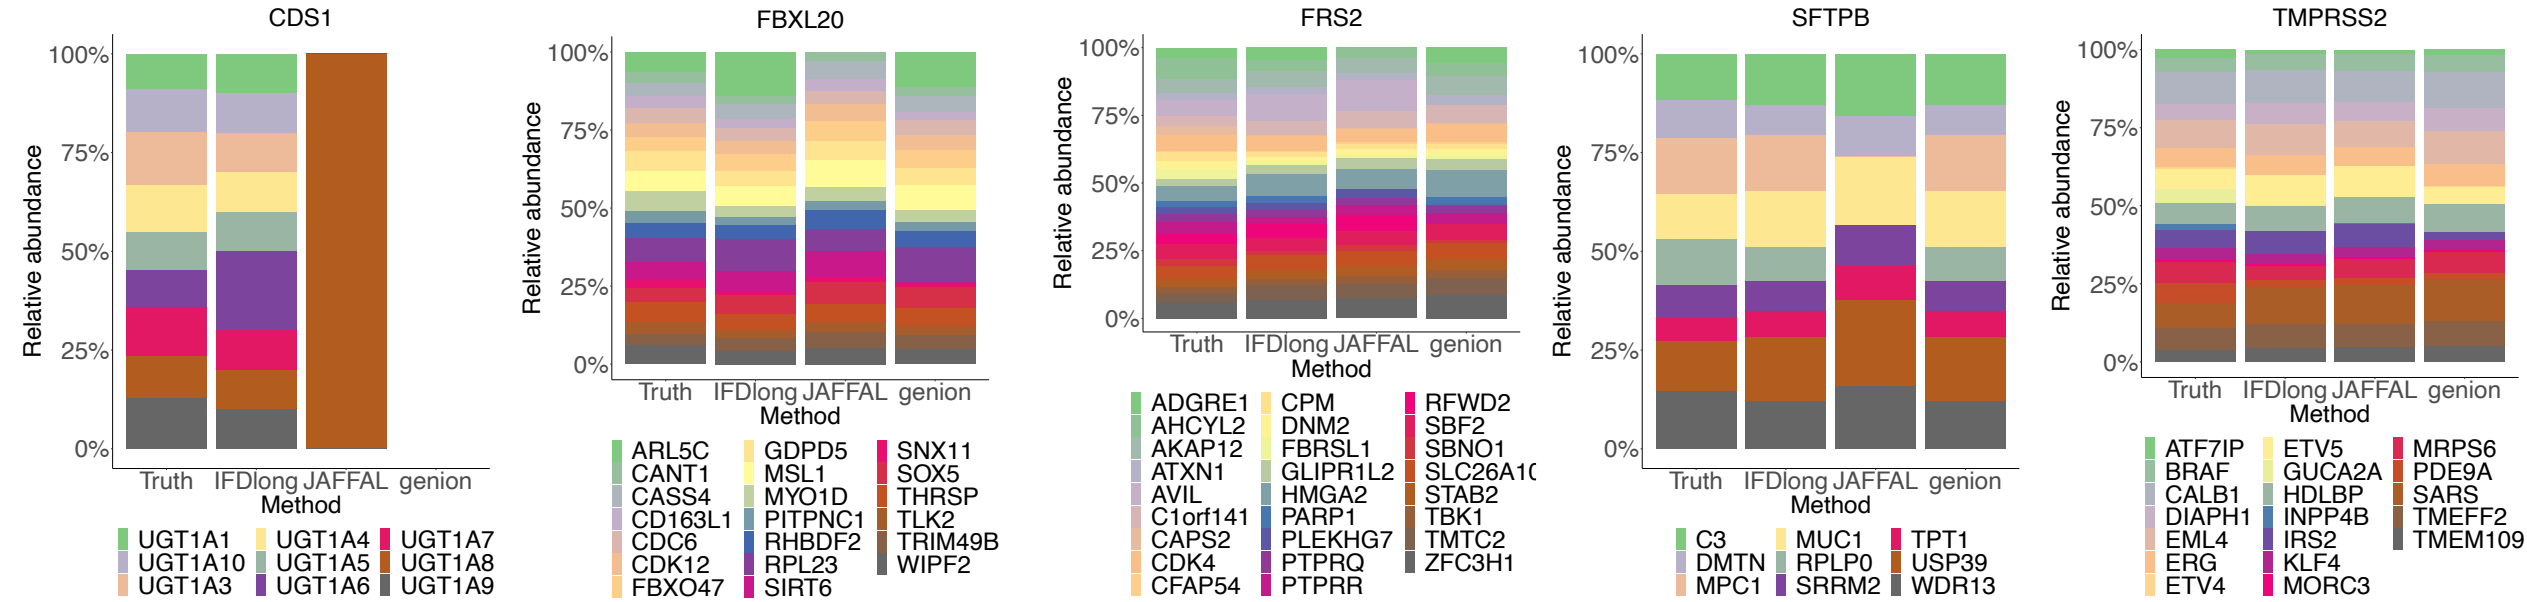

B

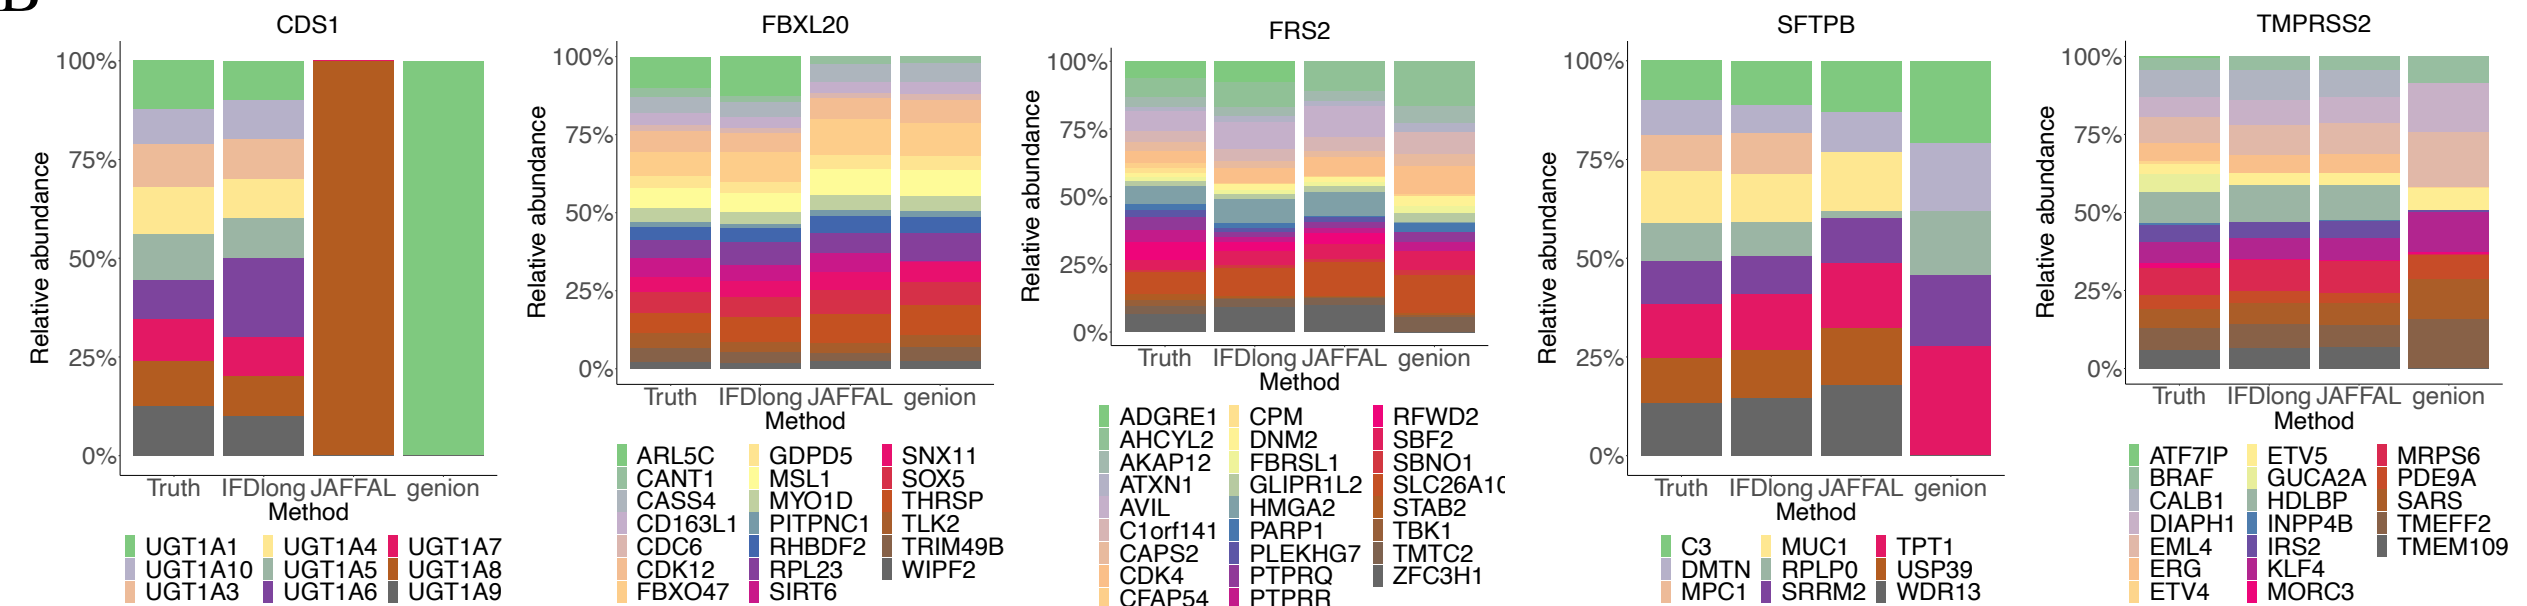

Figure S17

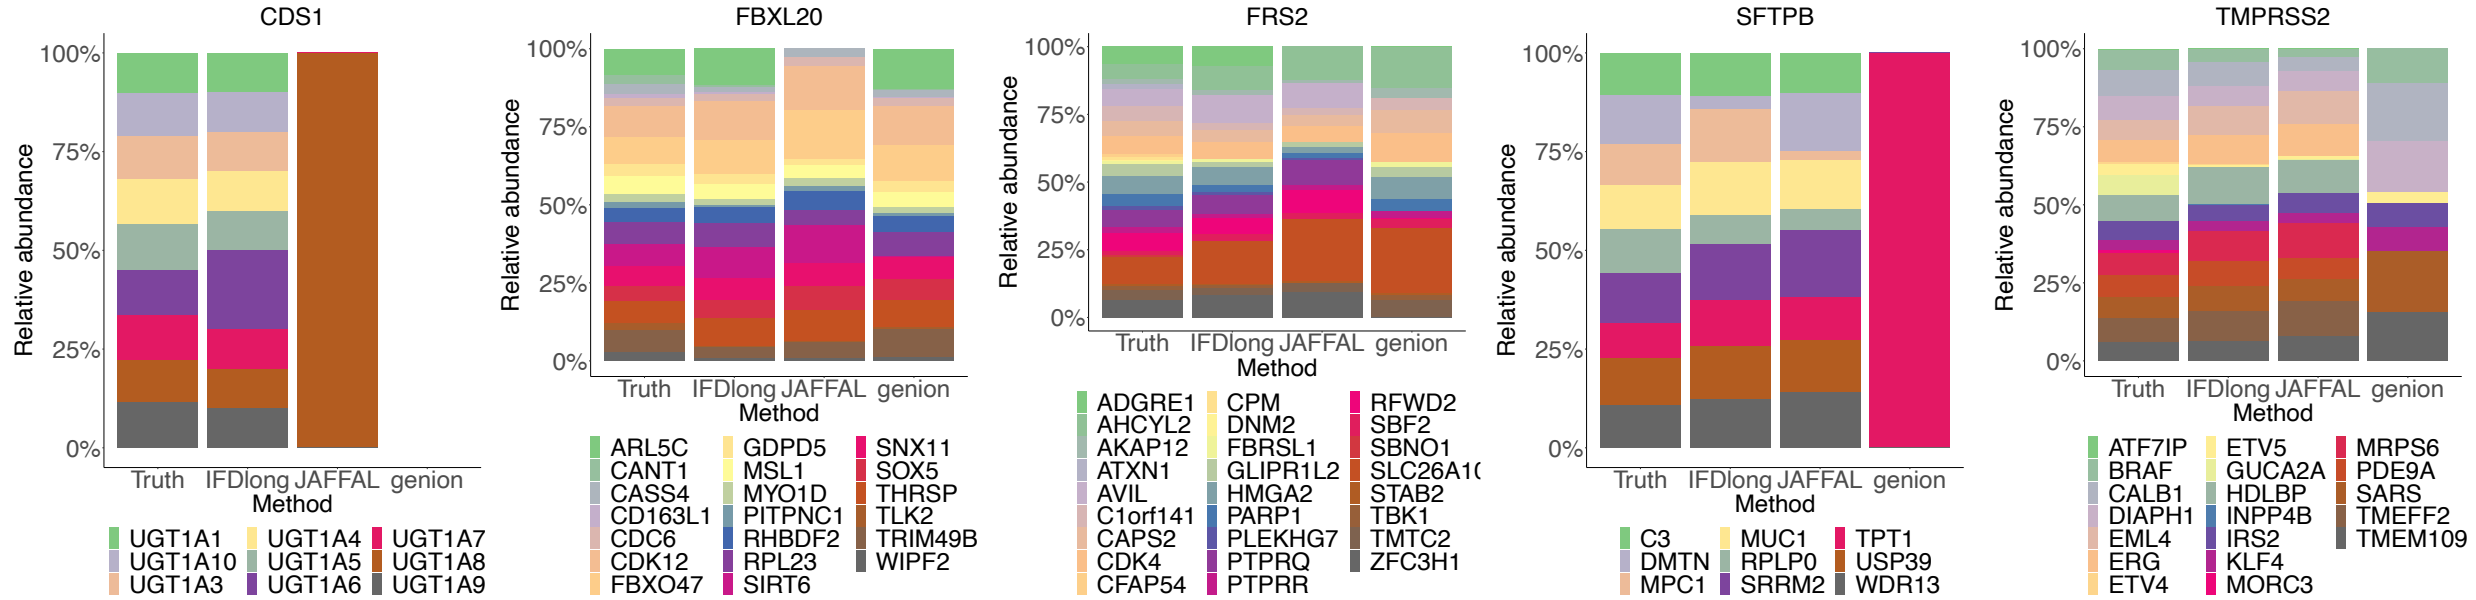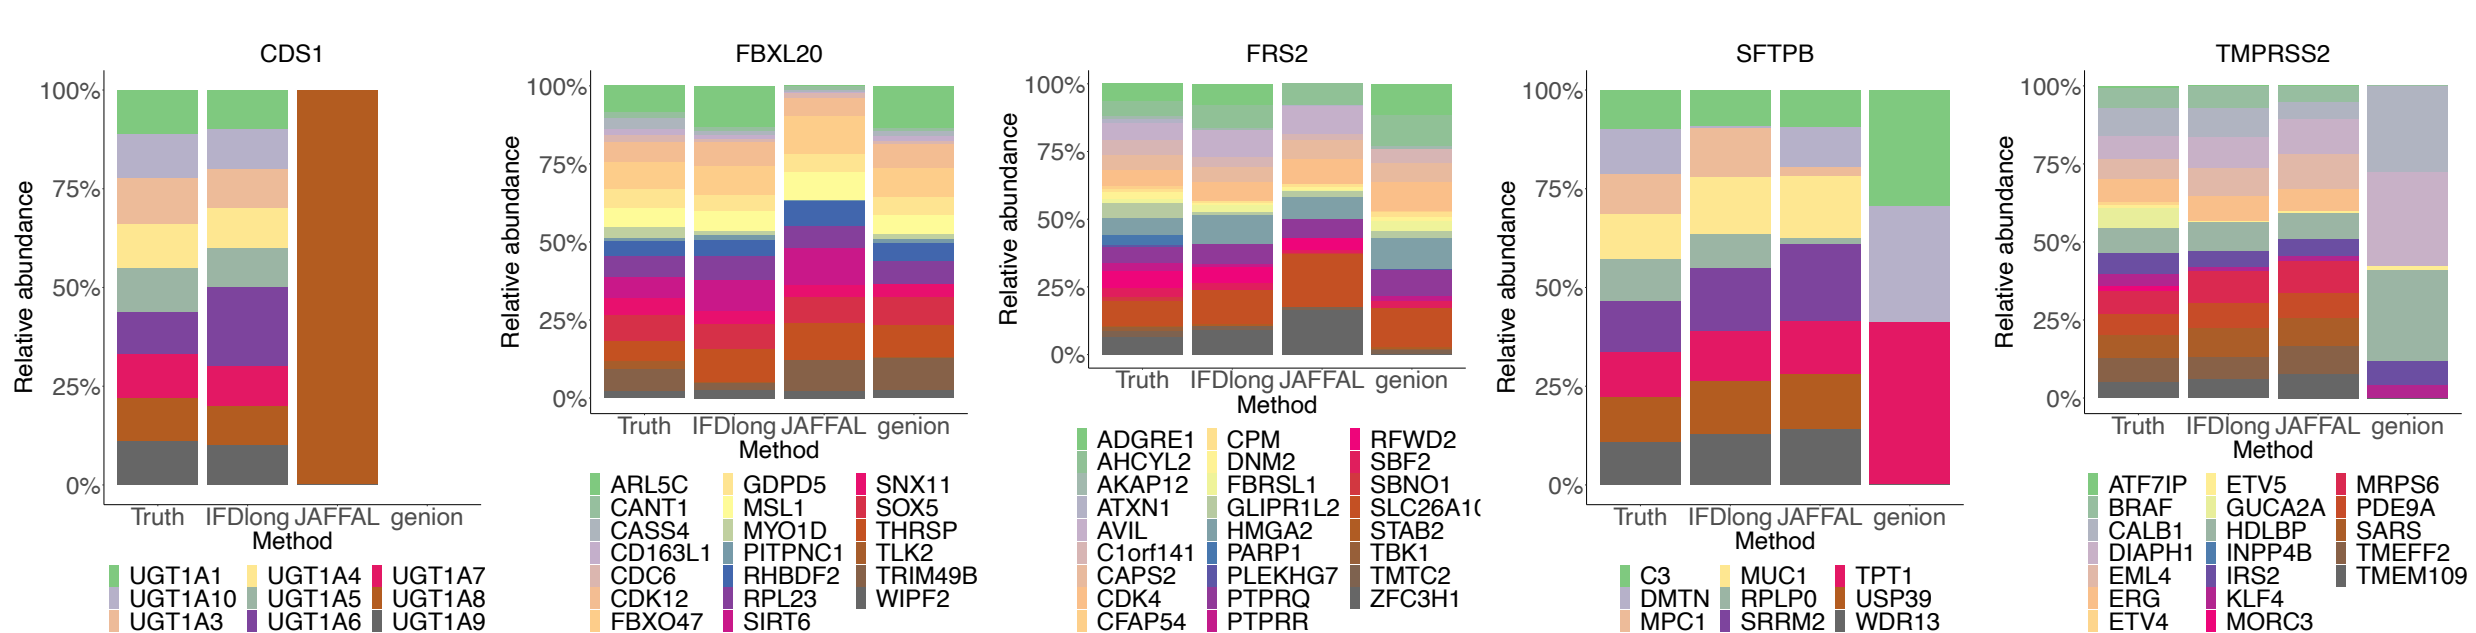

Figure S18

A

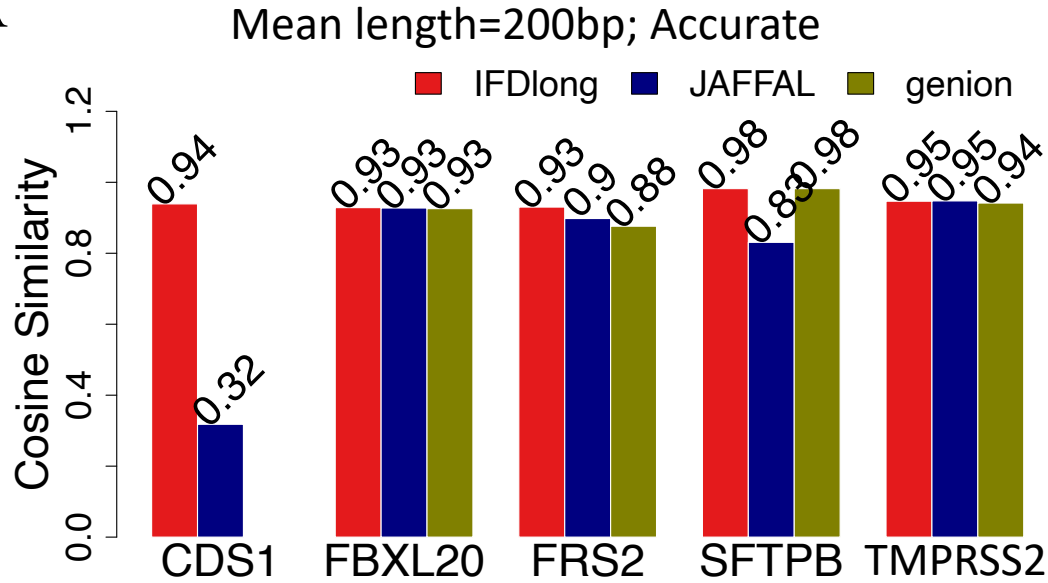

B

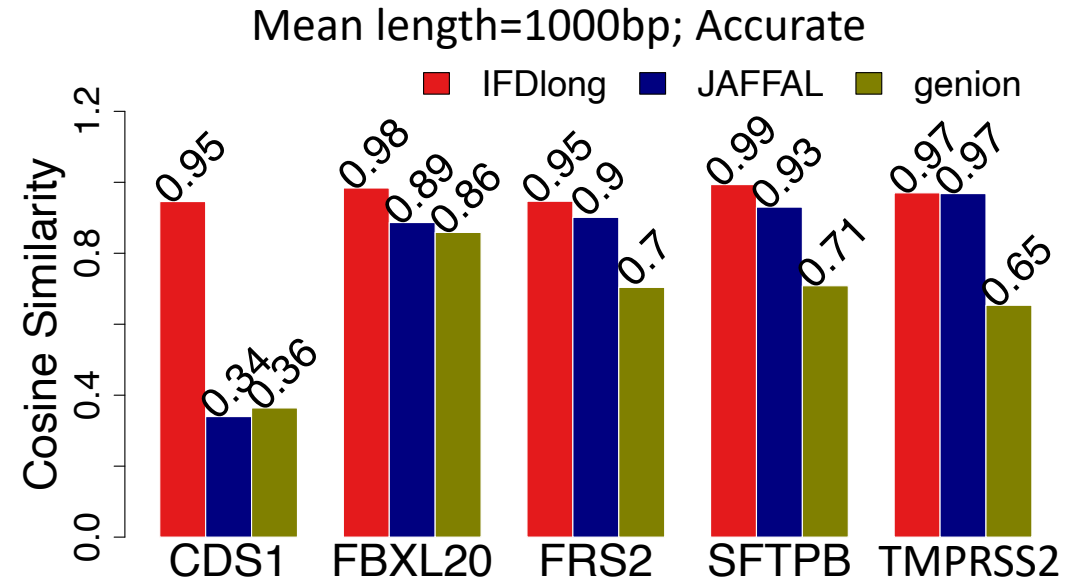

C

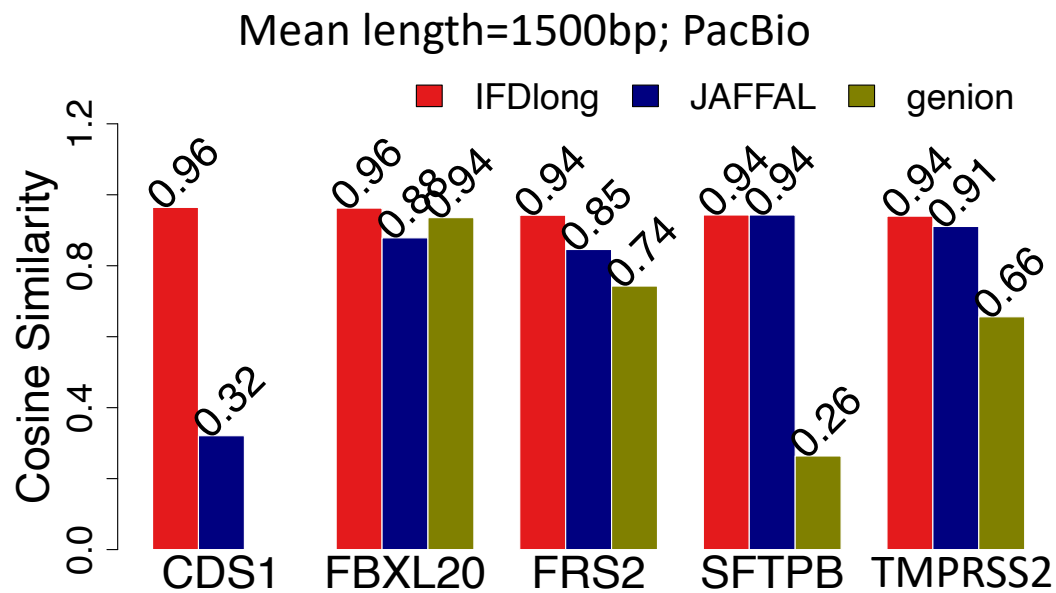

D

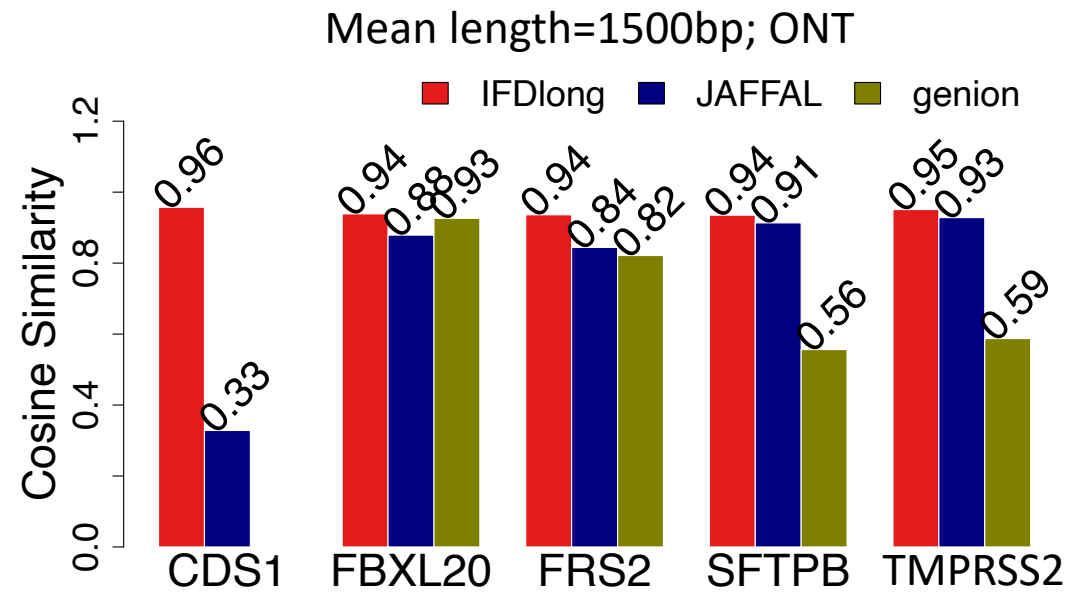

Supplement: NIHPP2024.05.11.593690v1-supplement-9.pdf [file NIHPP2024.05.11.593690v1-supplement-9.pdf]
